# Supplementary material for: Direct metal-free synthesis of diarylamines from 2-nitropropane via the twofold C–H functionalization of arenes
Source: Royal Society of Chemistry journal article supplement (doi:10.1039/c5ra17668a), 2015-01-01
Supplement: c5ra17668a1.pdf [file c5ra17668a1.pdf]

# Direct metal-free synthesis of diarylamines from 2-nitropropane via the twofold C-H functionalization of arenes

Alexander V. Aksenov,\* Nicolai A. Aksenov, Naila A. Orazova, Dmitrii A. Aksenov, Maksim V. Dmitriev, and Michael Rubin\*<sup>a,c</sup>

## Supporting Information

### Table of Content

|                                                                |    |
|----------------------------------------------------------------|----|
| <a href="#">1H and 13C Spectral Charts</a> .....               | 2  |
| <a href="#">HRMS Spectral Charts</a> .....                     | 32 |
| <a href="#">ORTEP Drawings for X-Ray Crystallography</a> ..... | 38 |

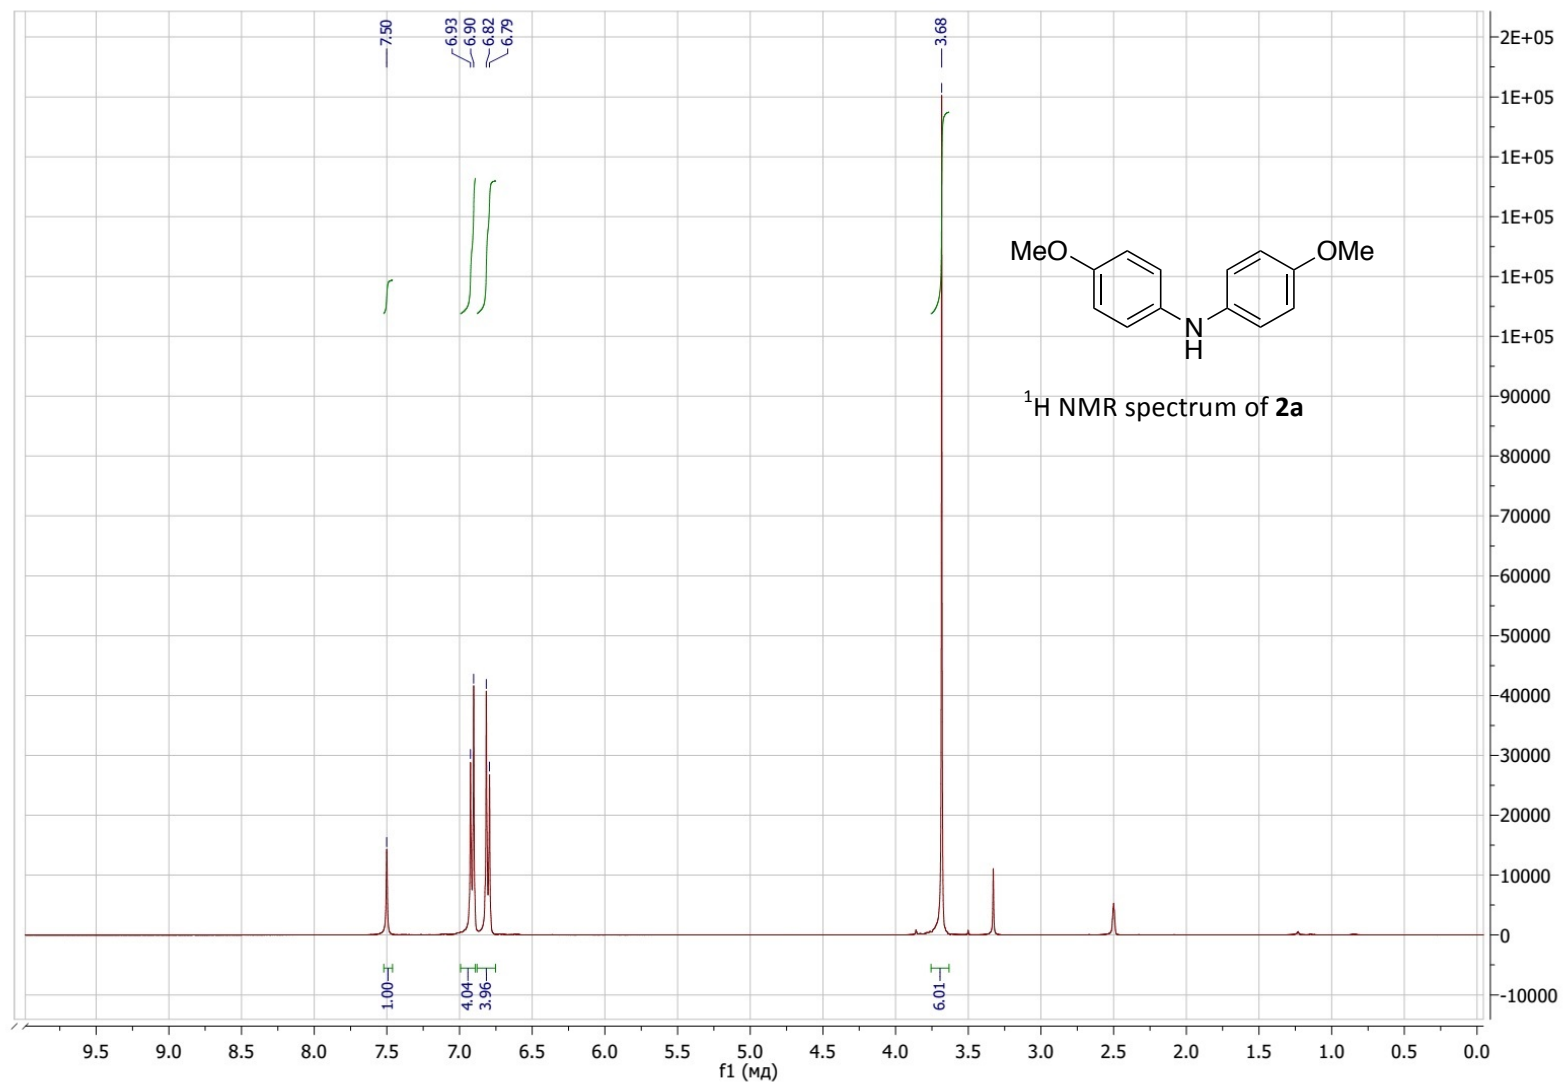

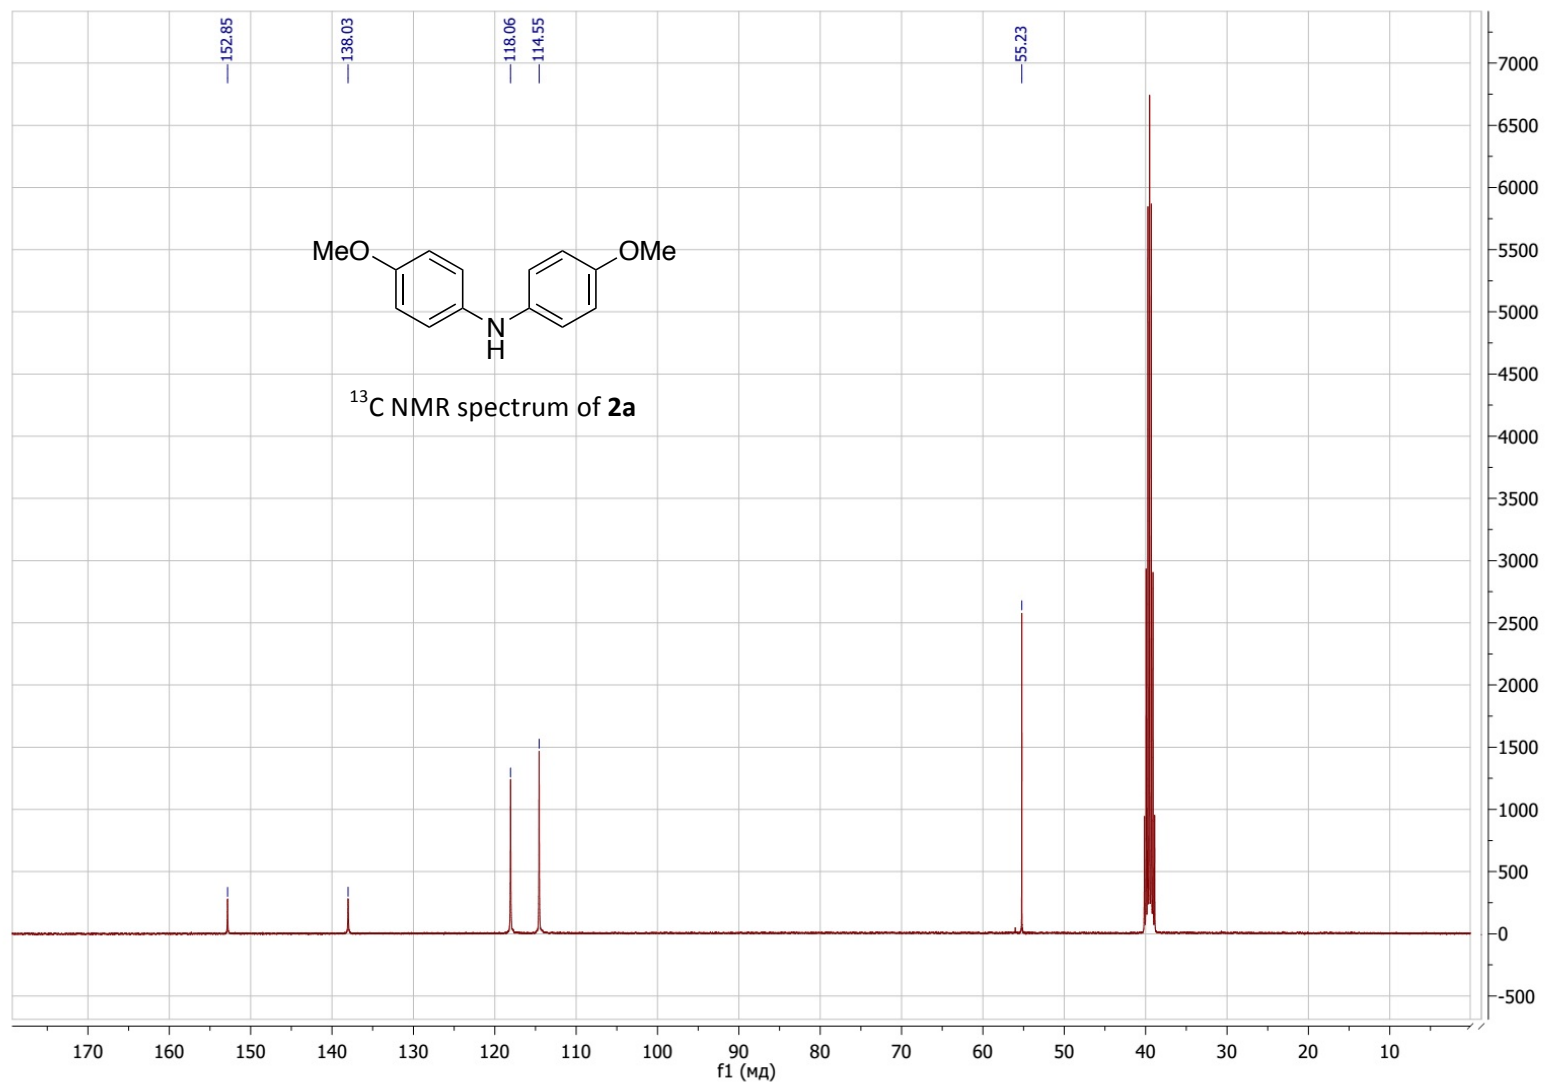

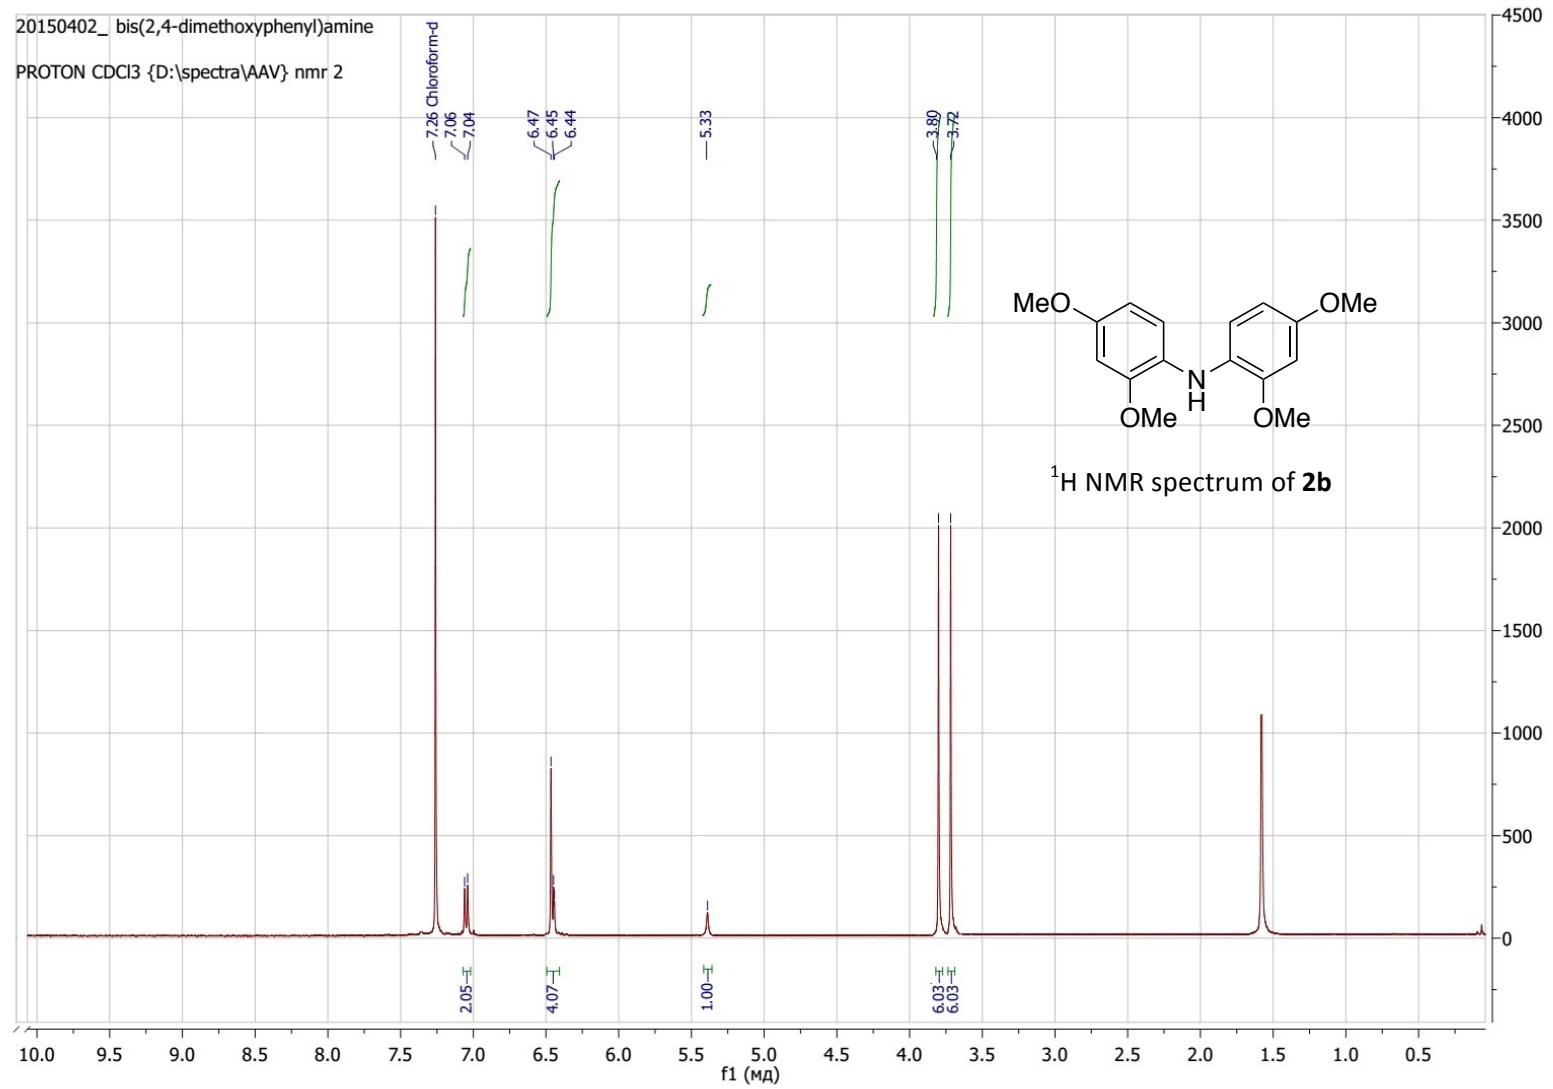

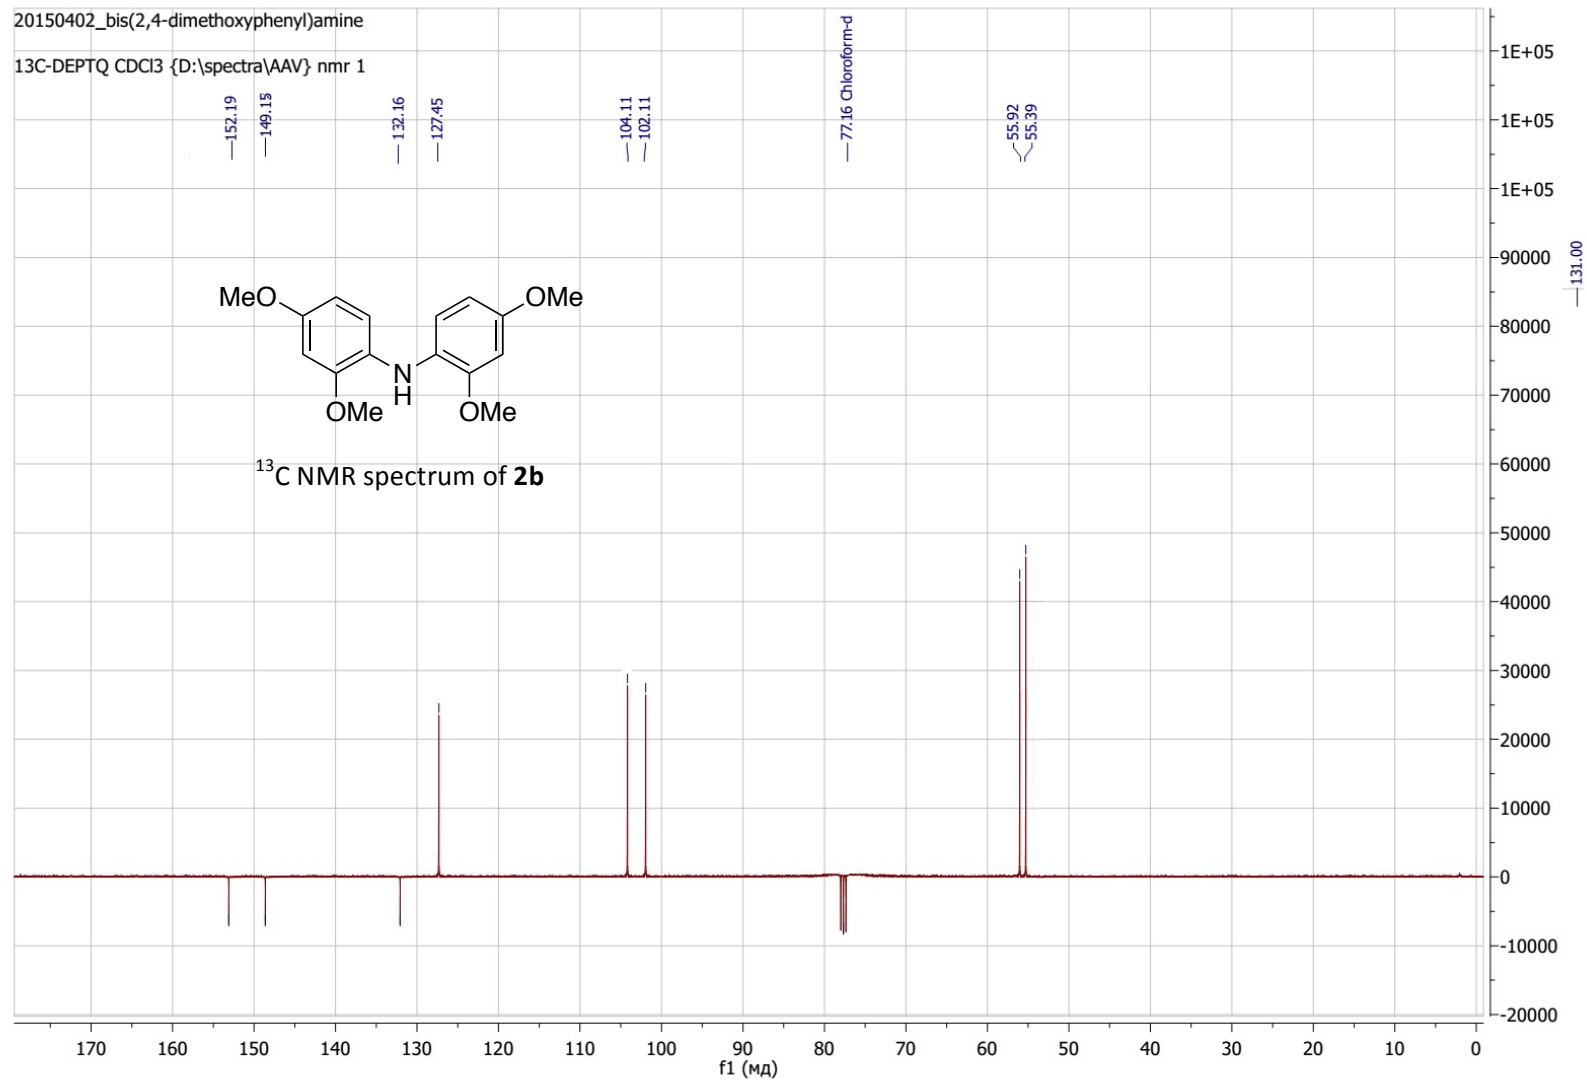

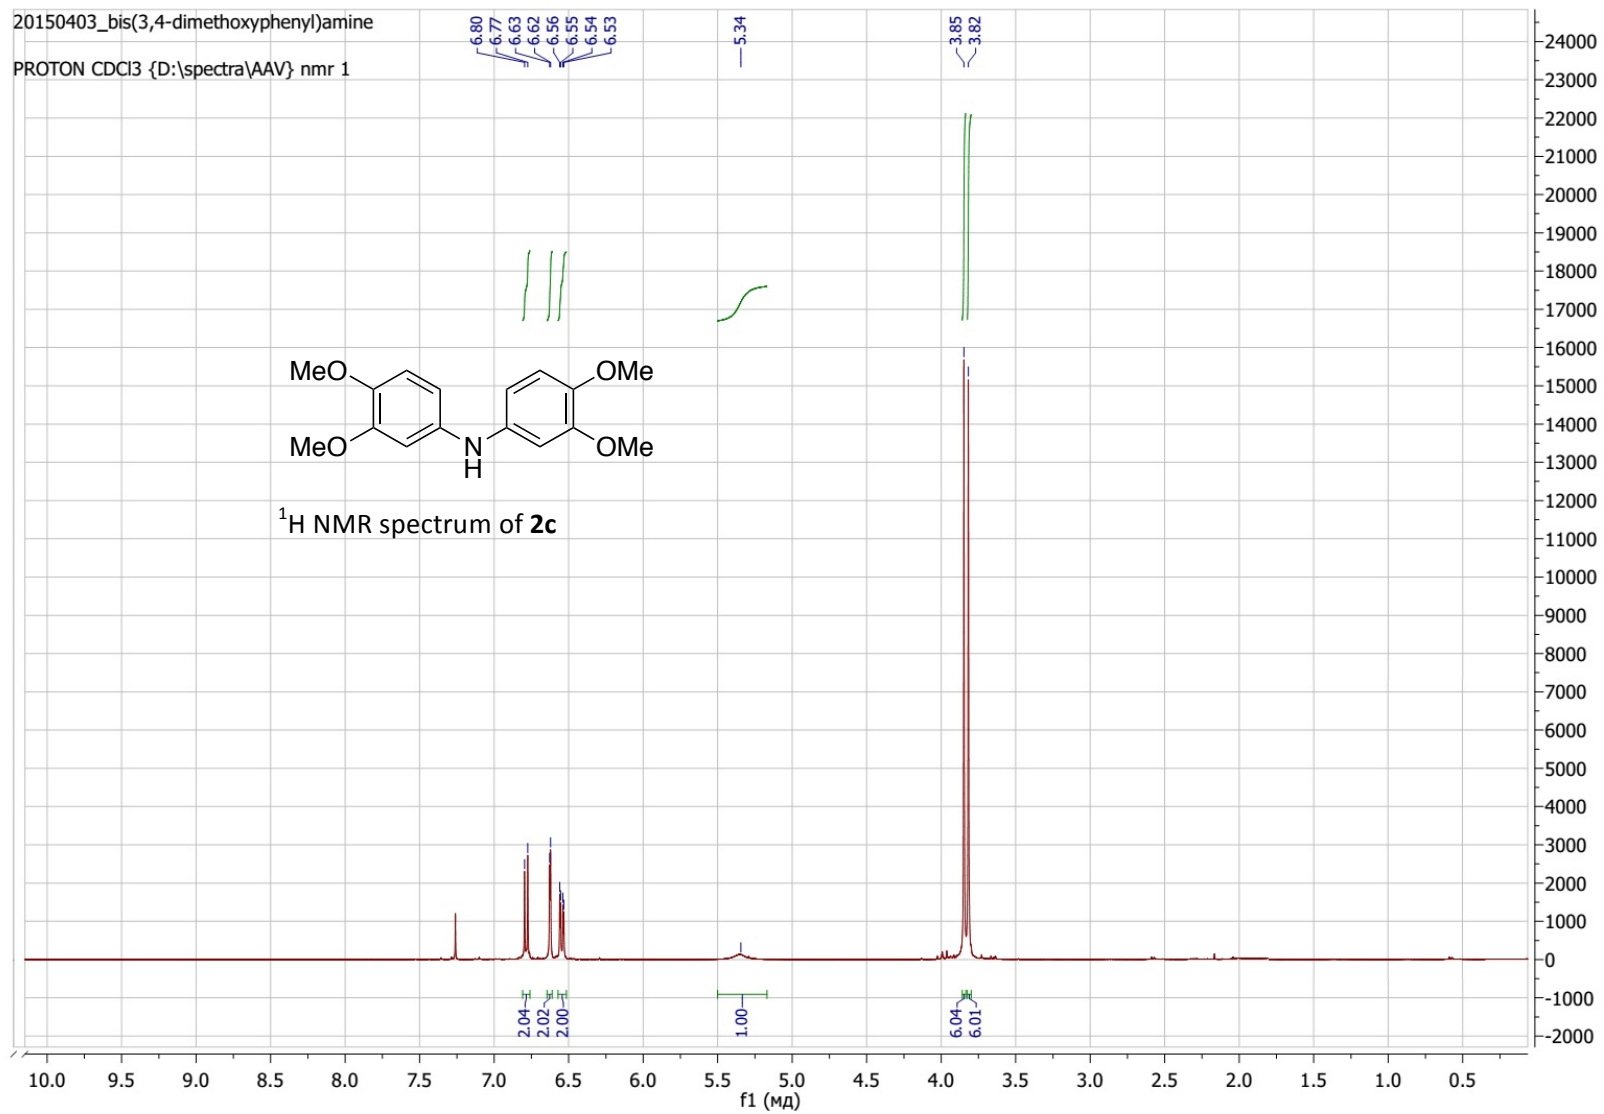

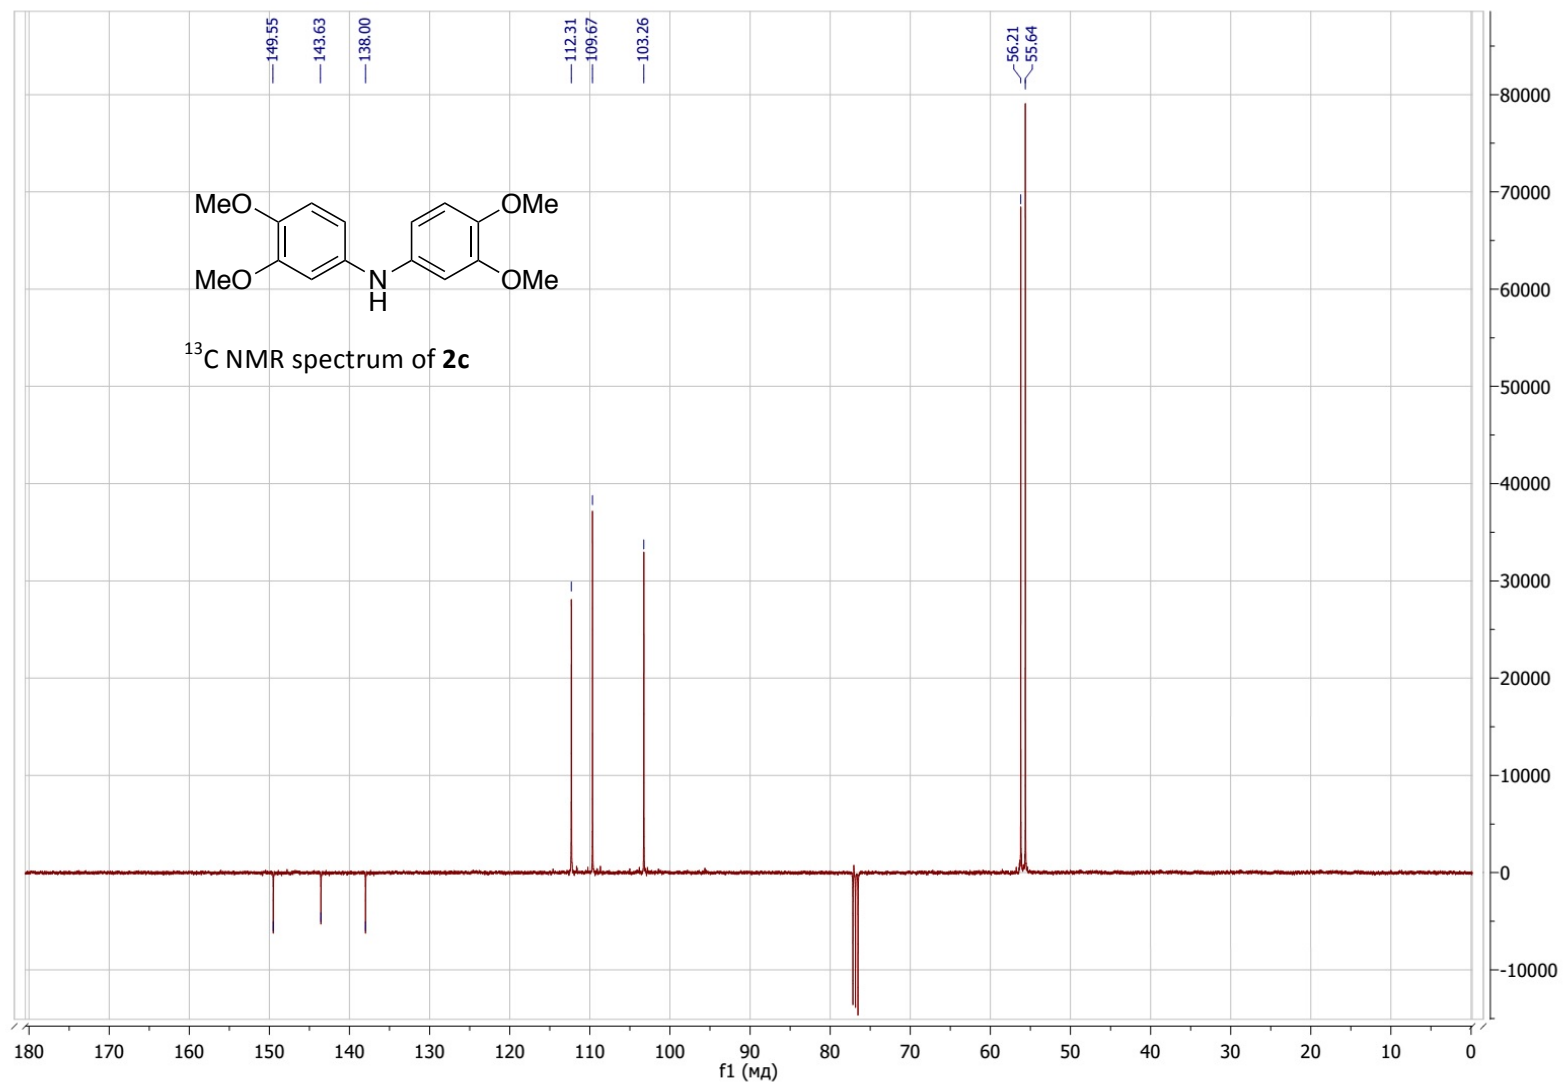

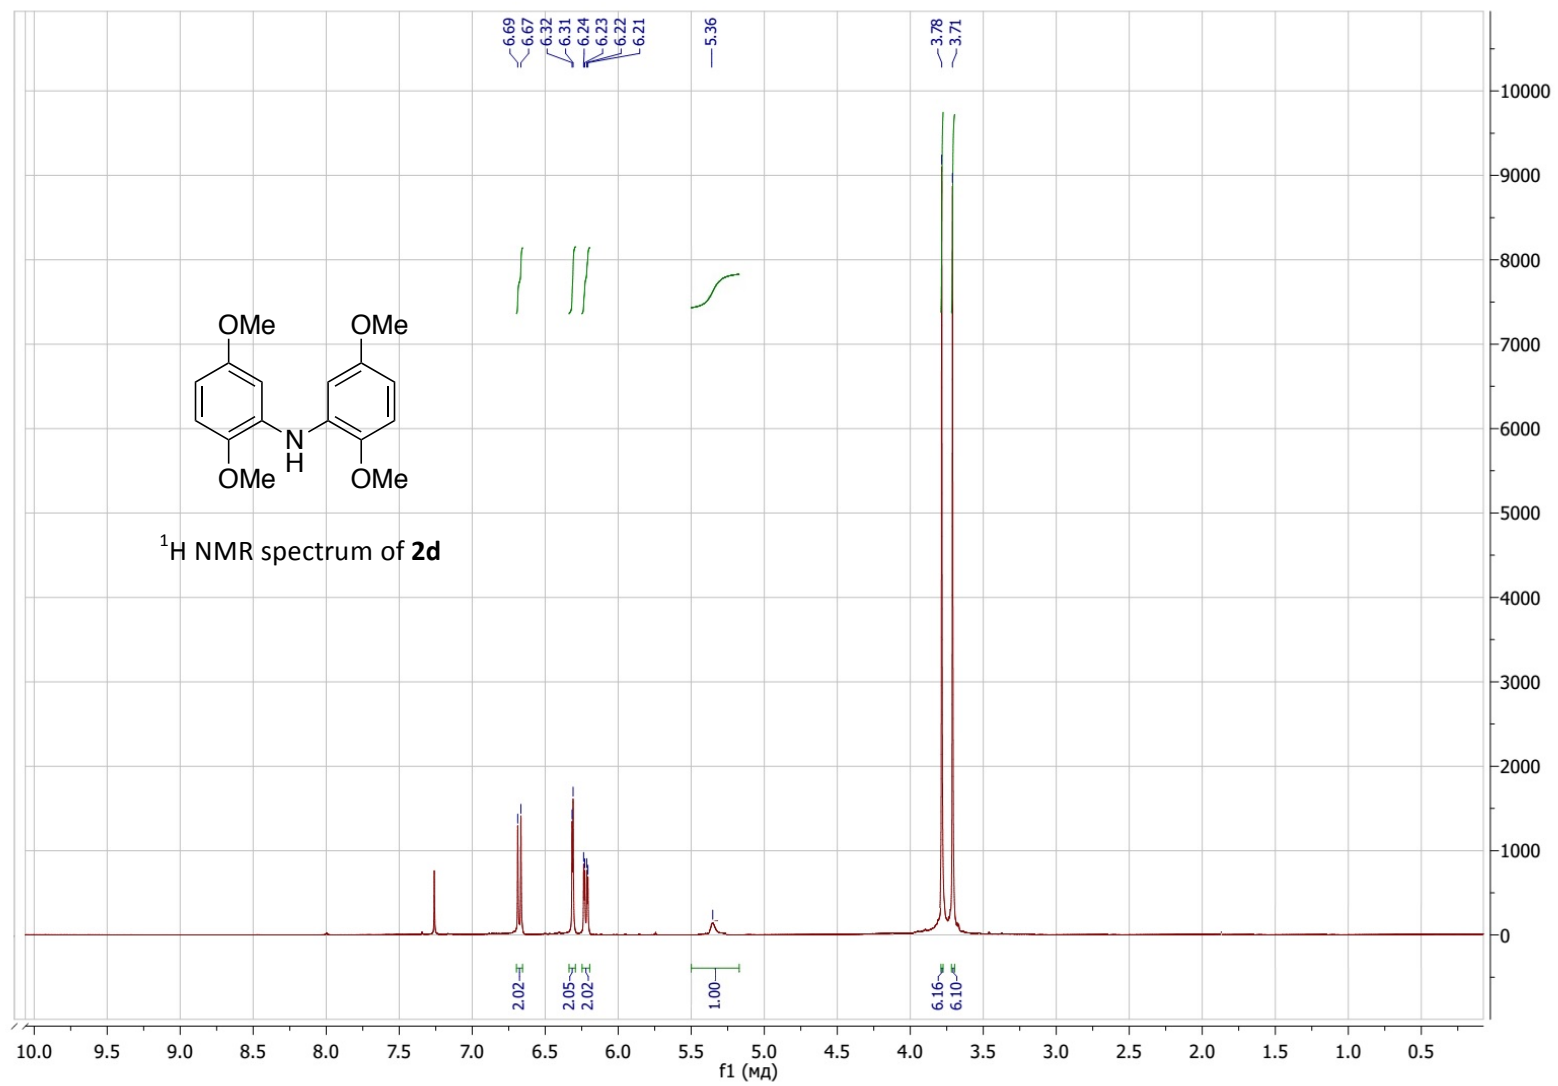



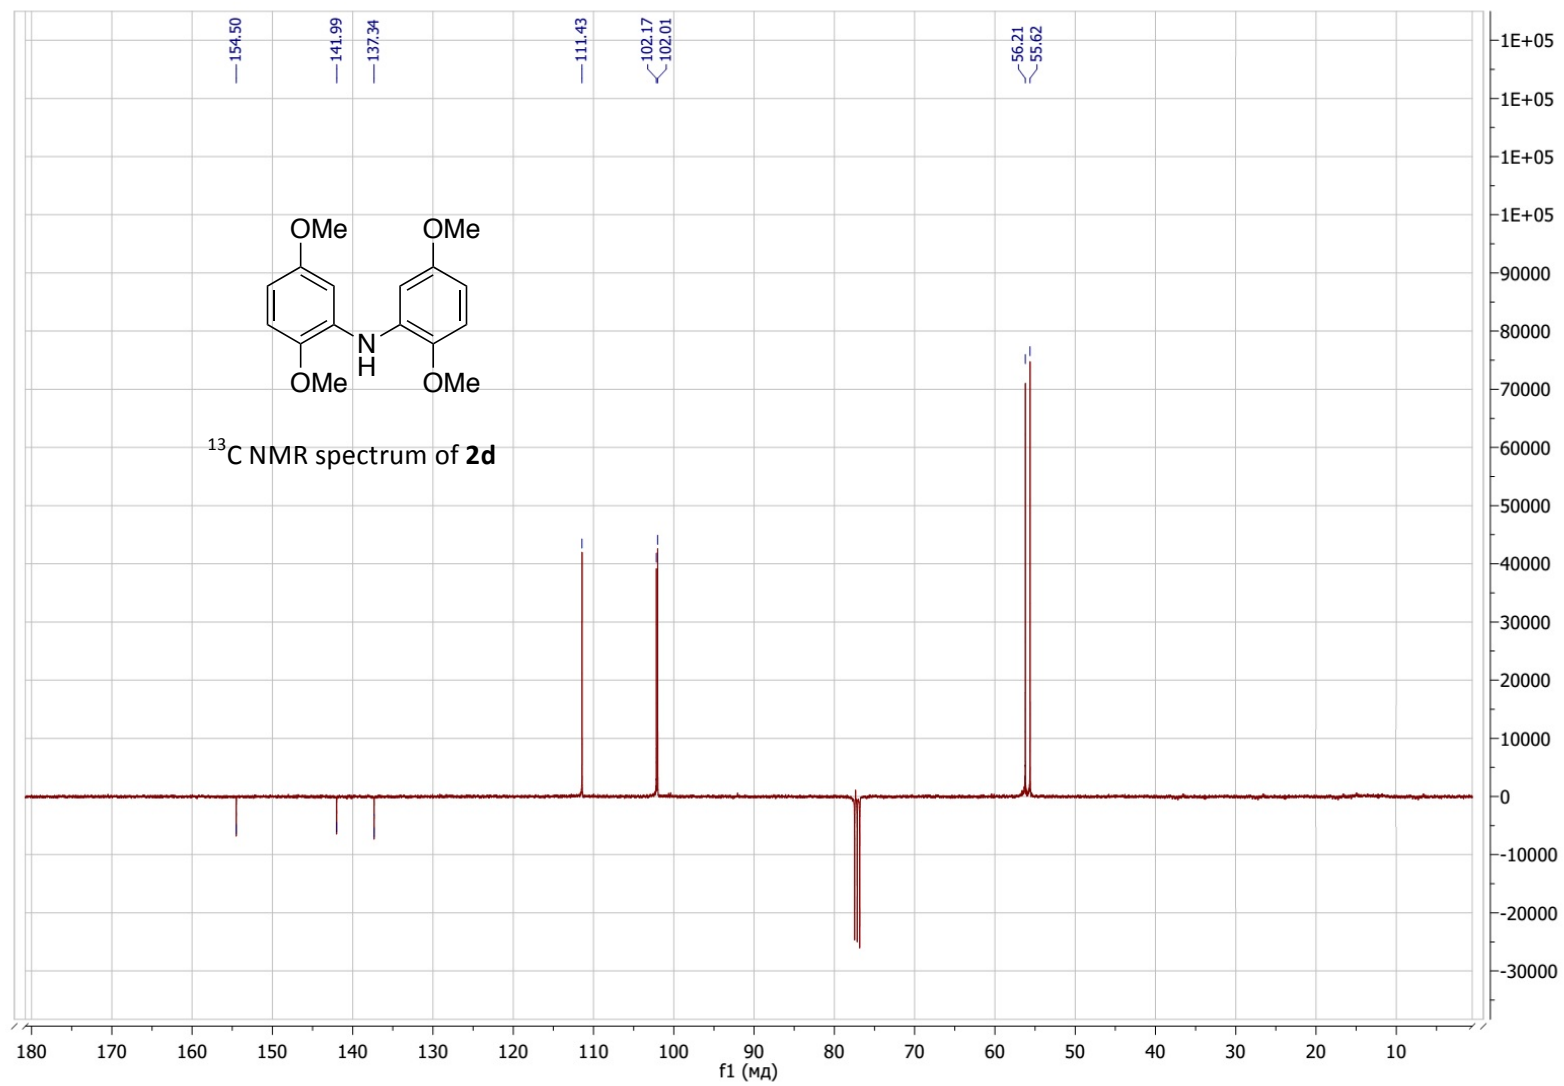

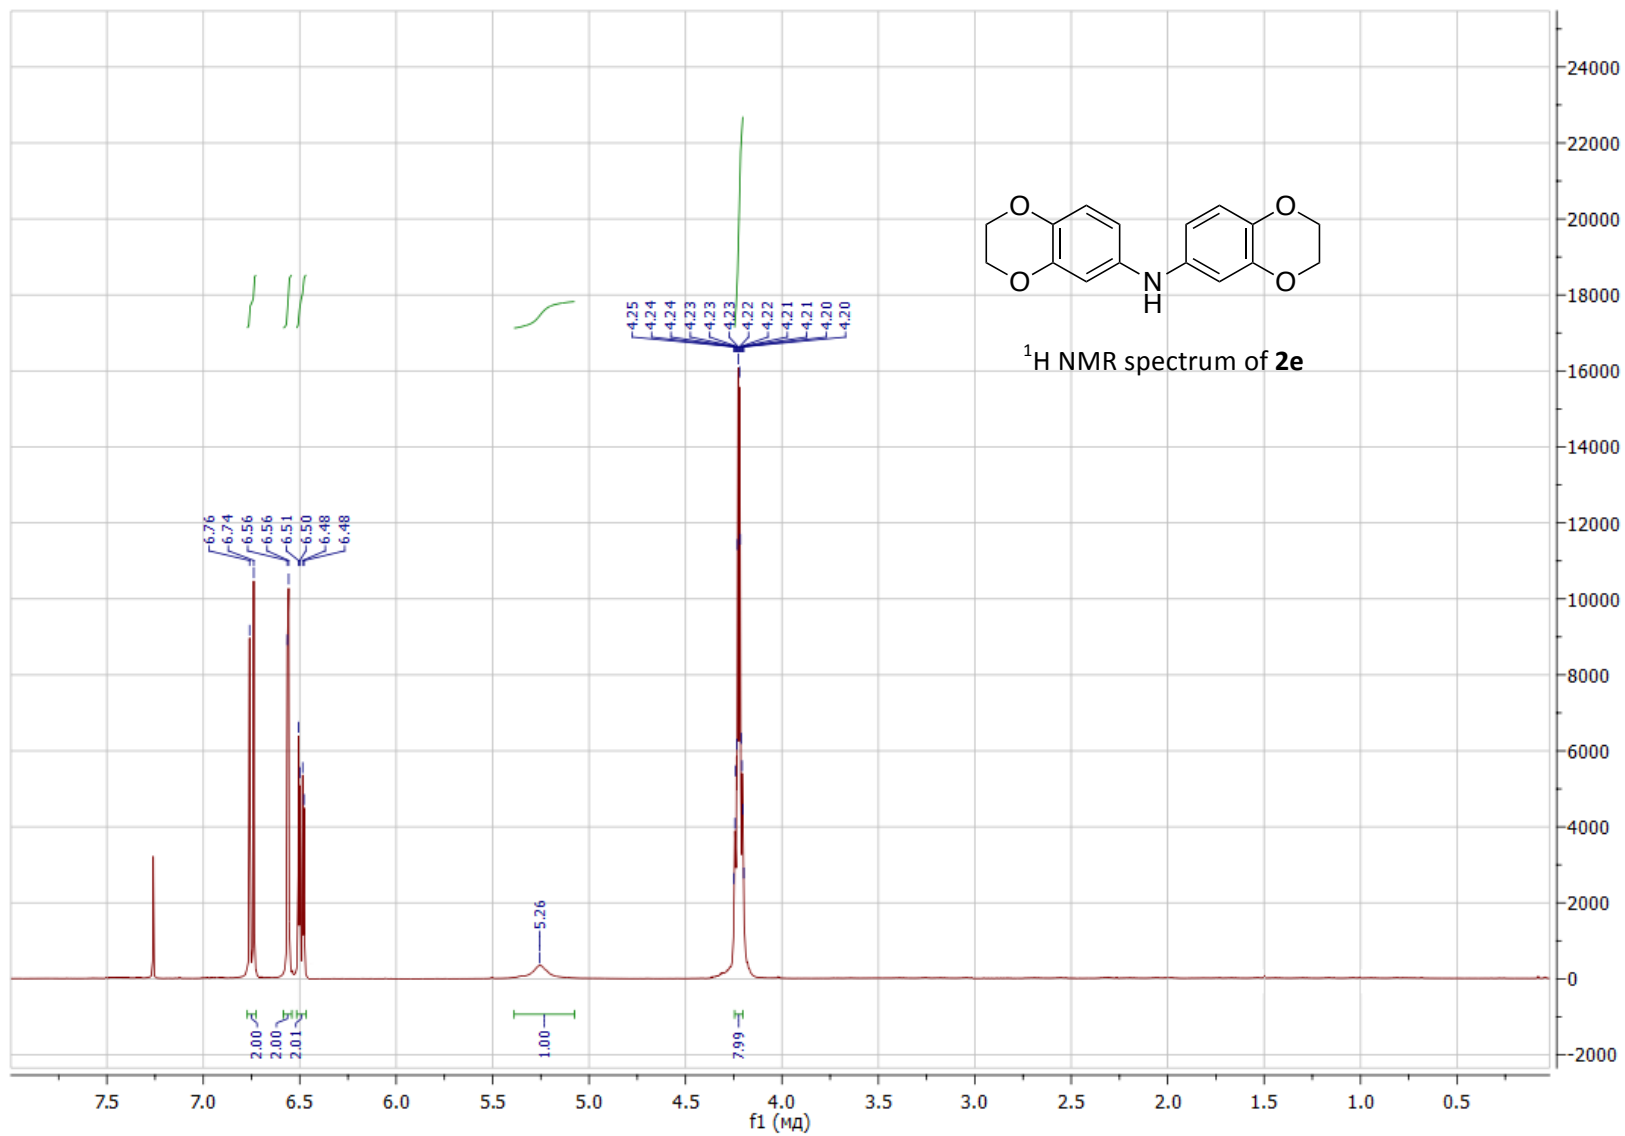

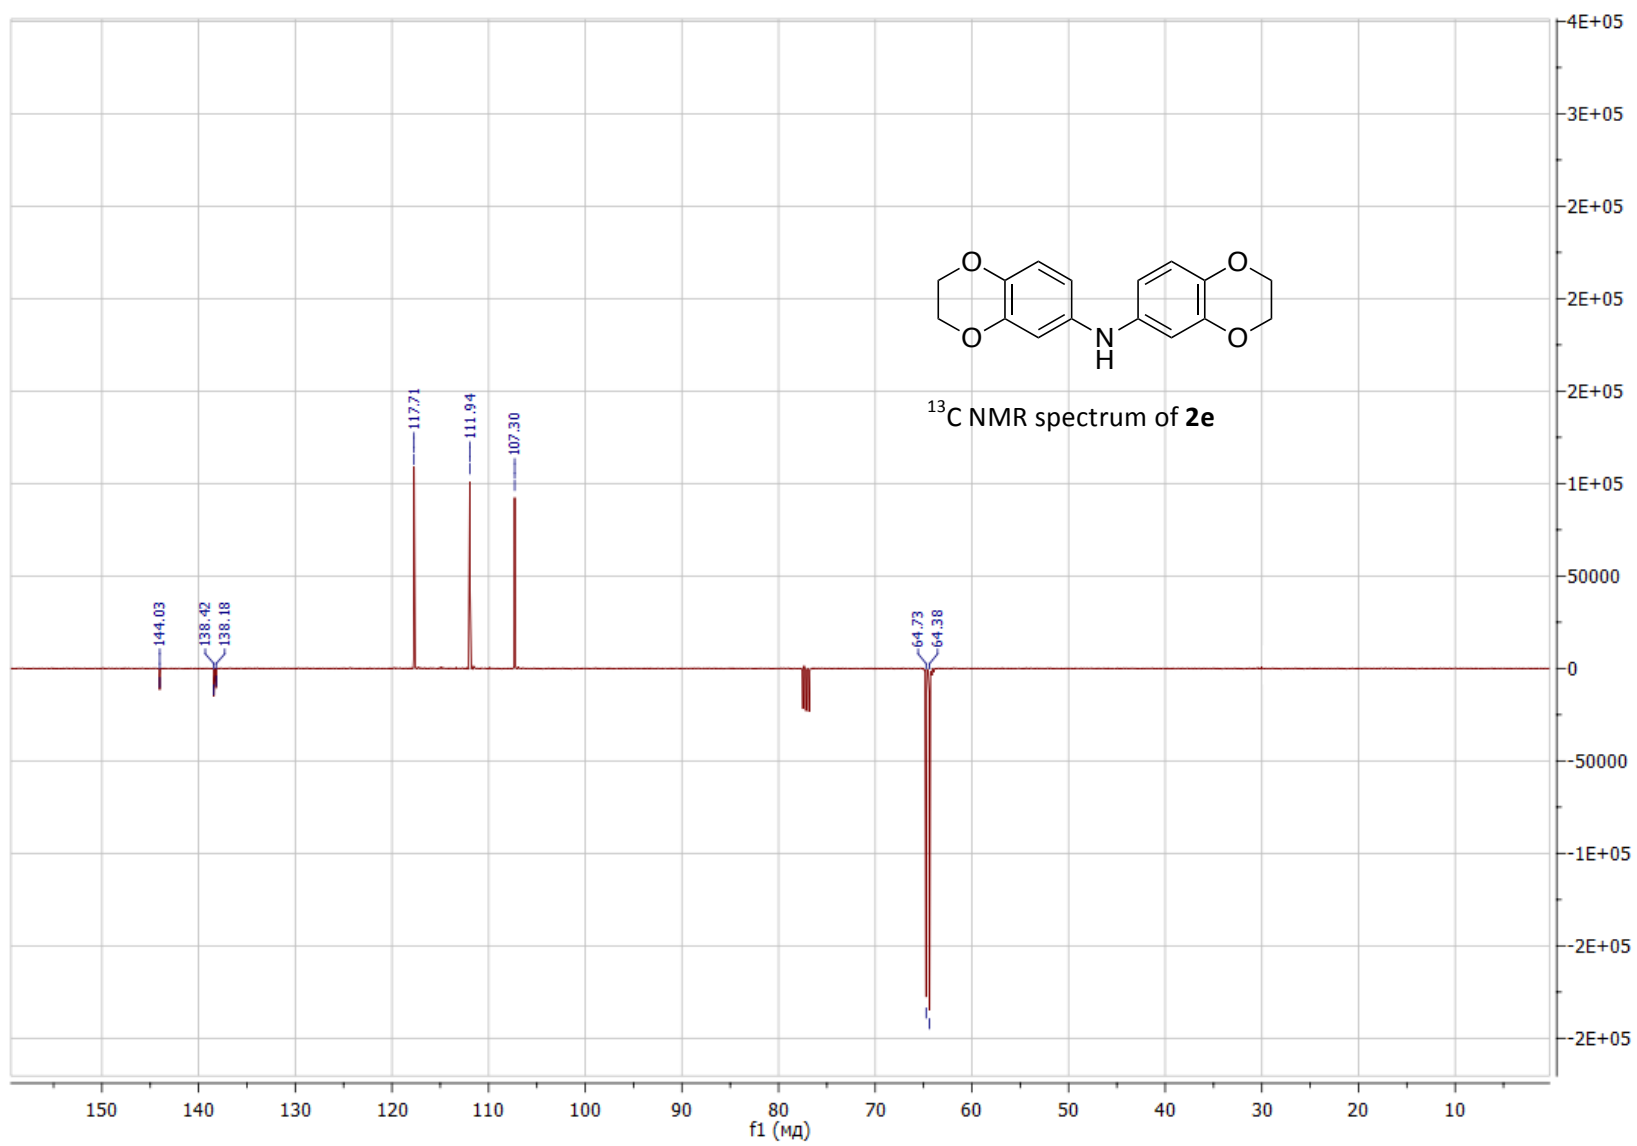

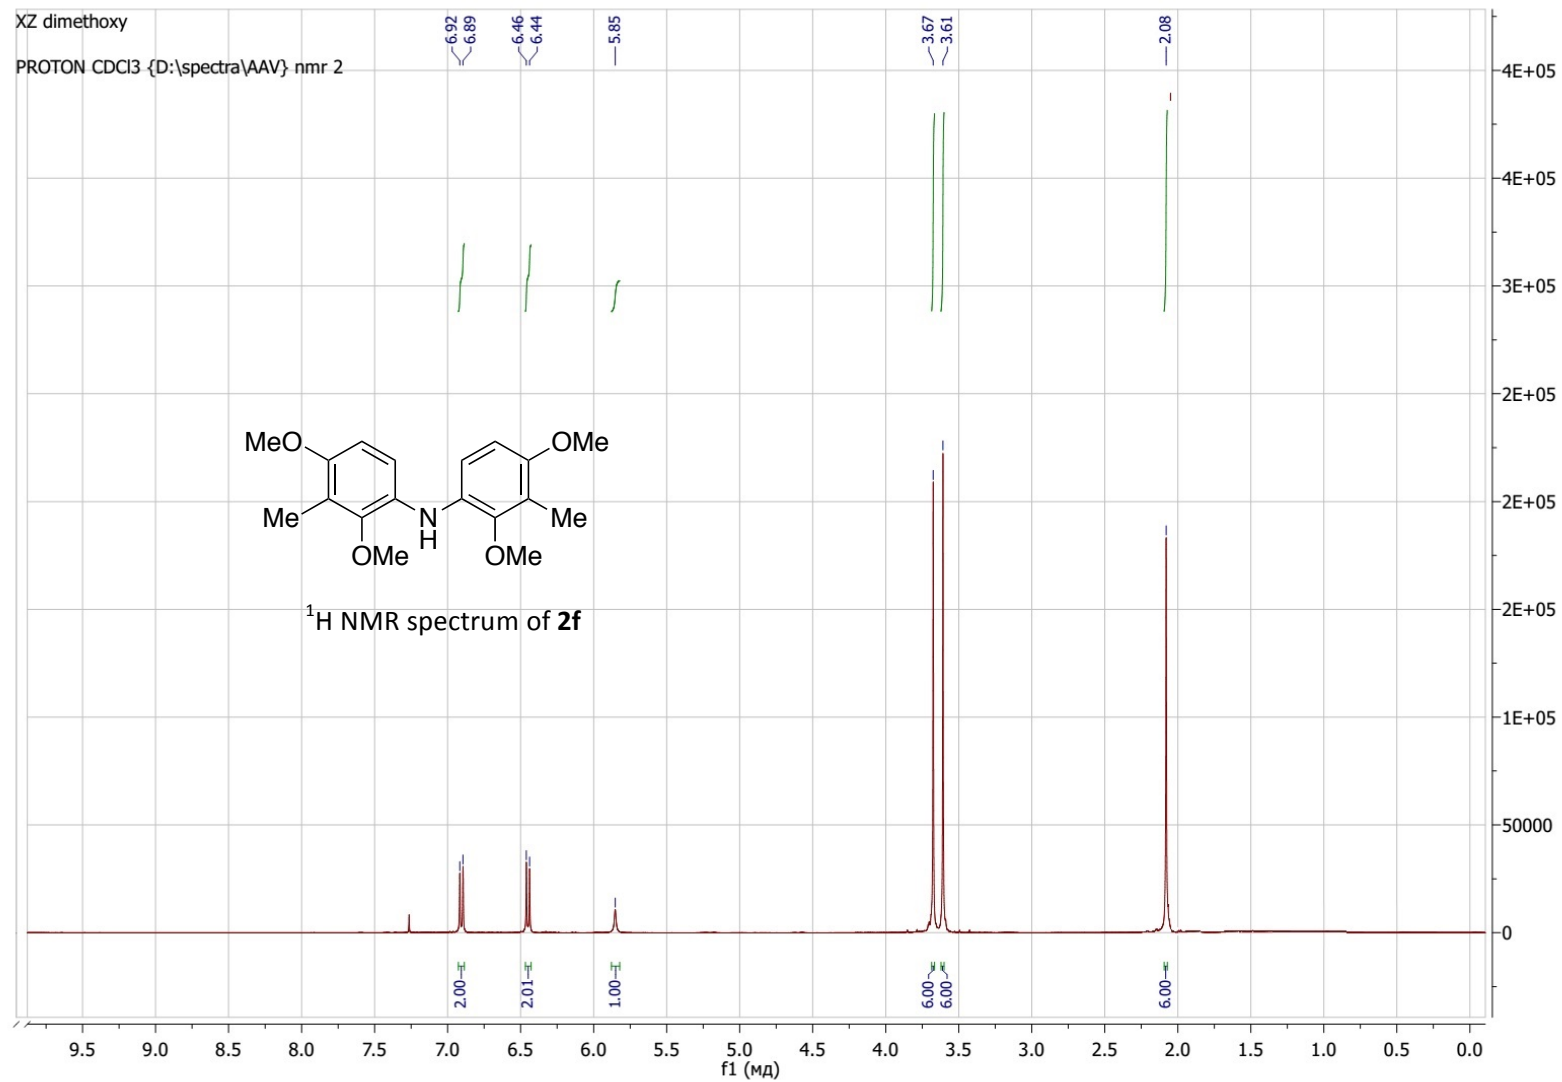

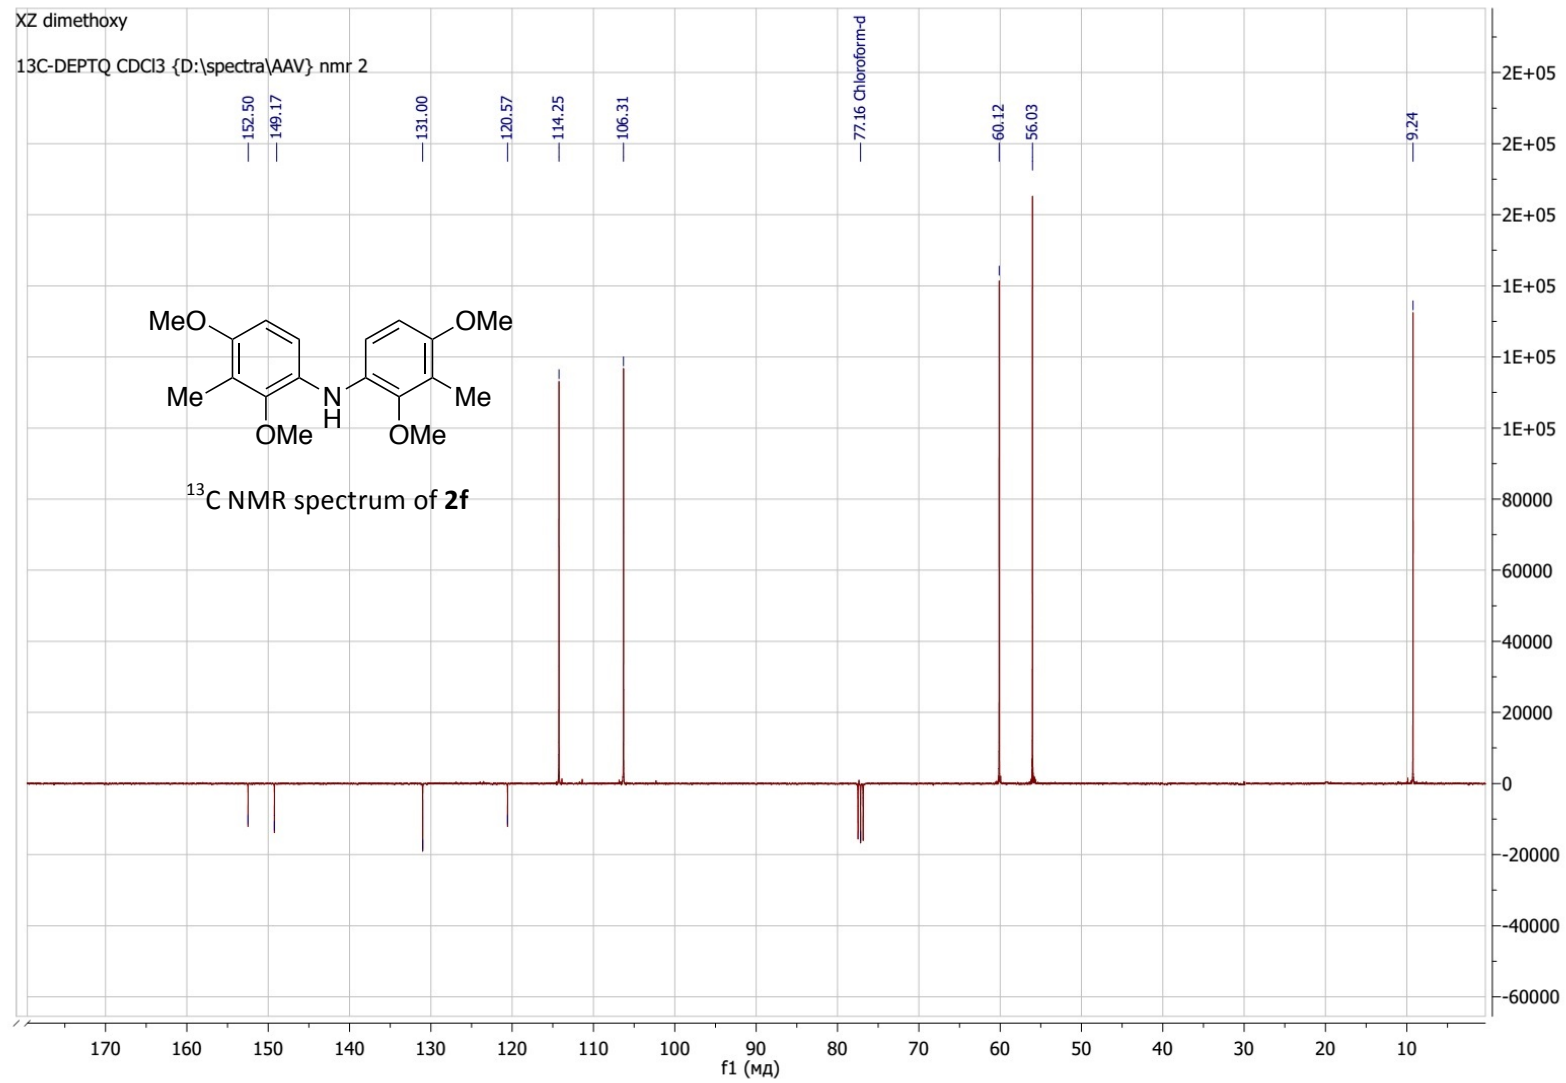

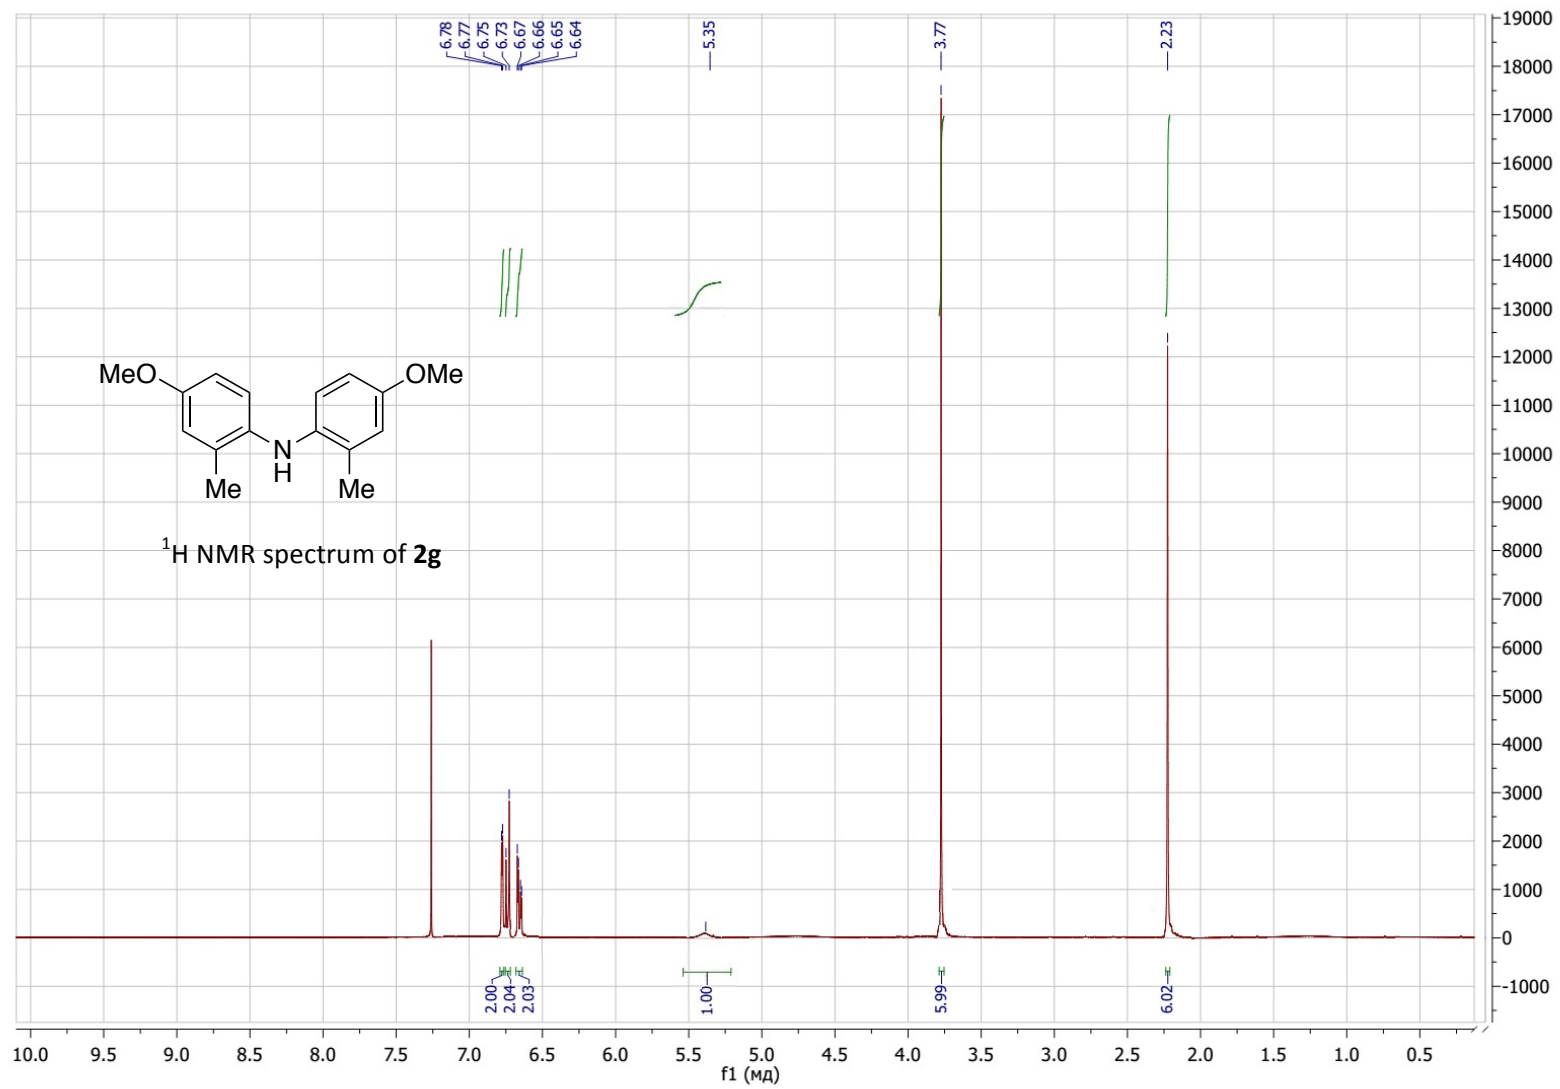

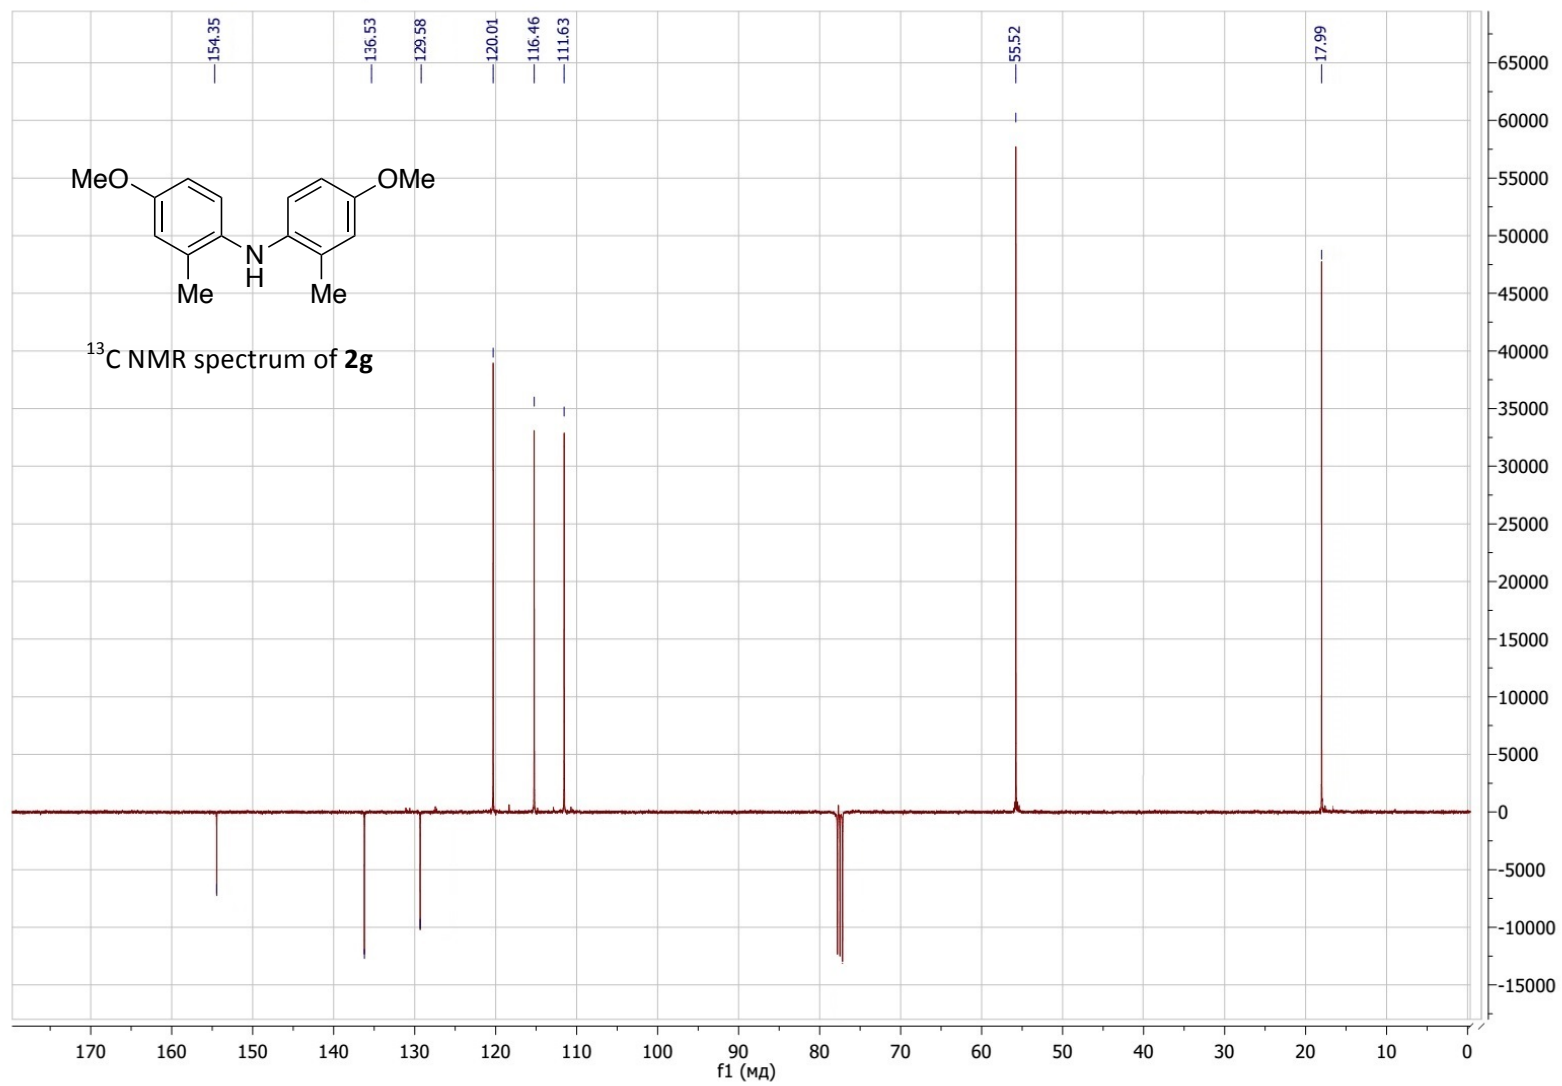

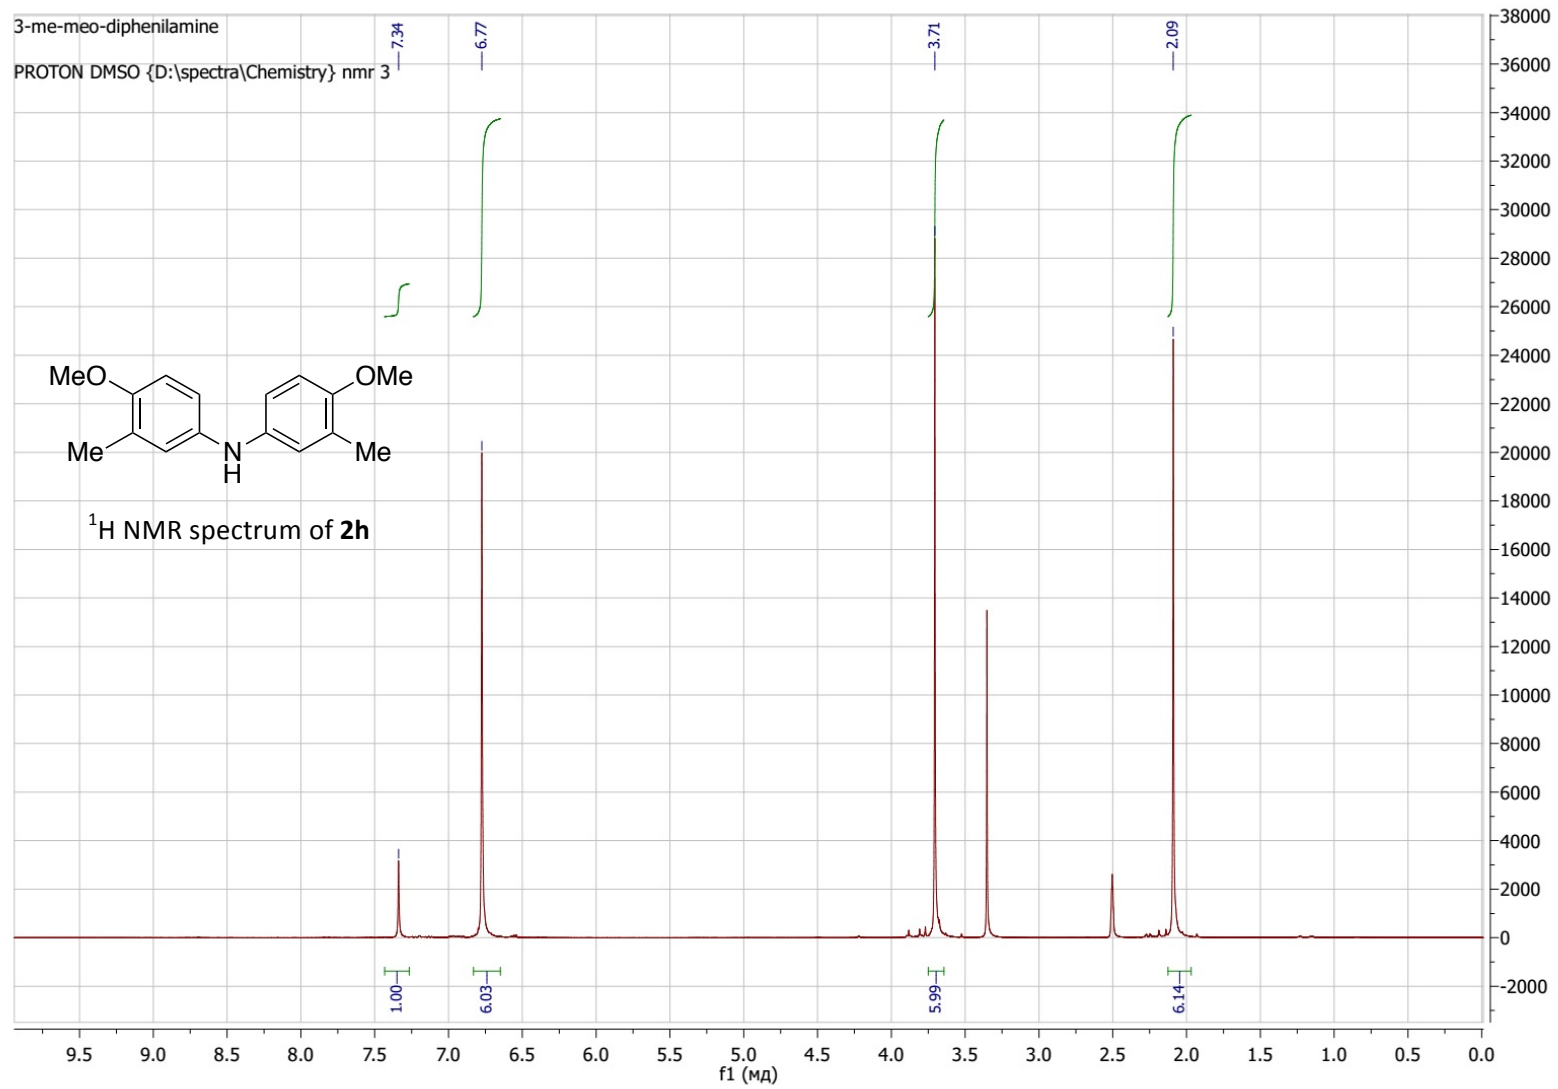



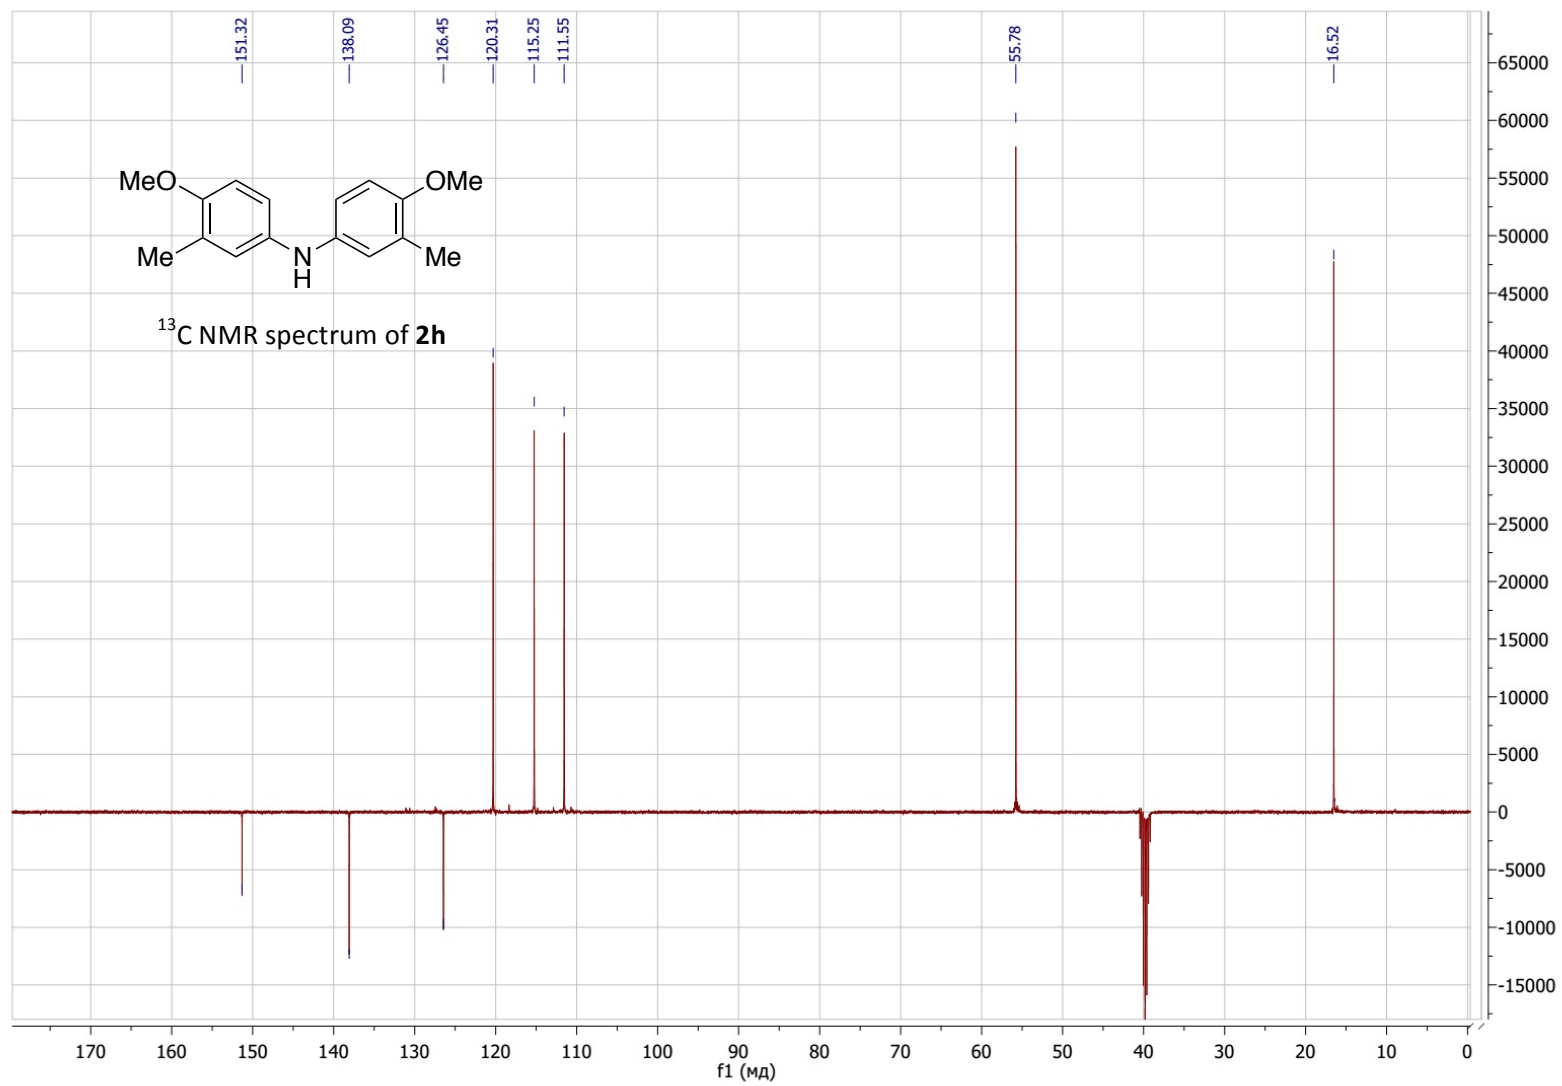

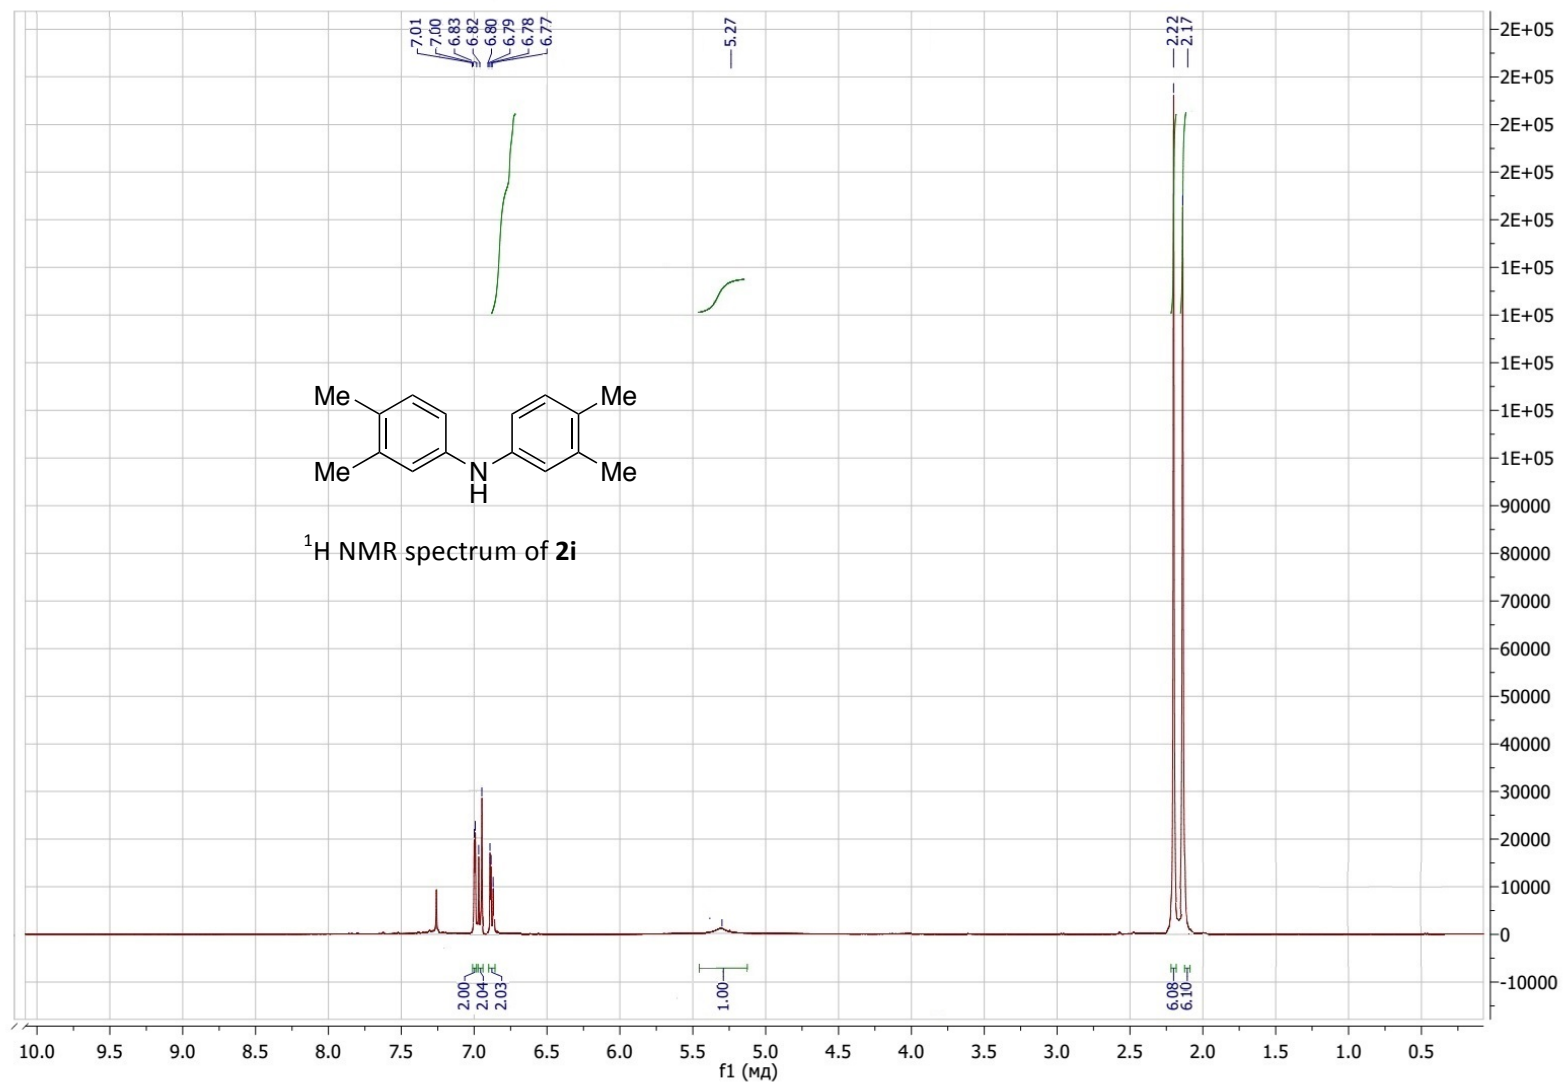

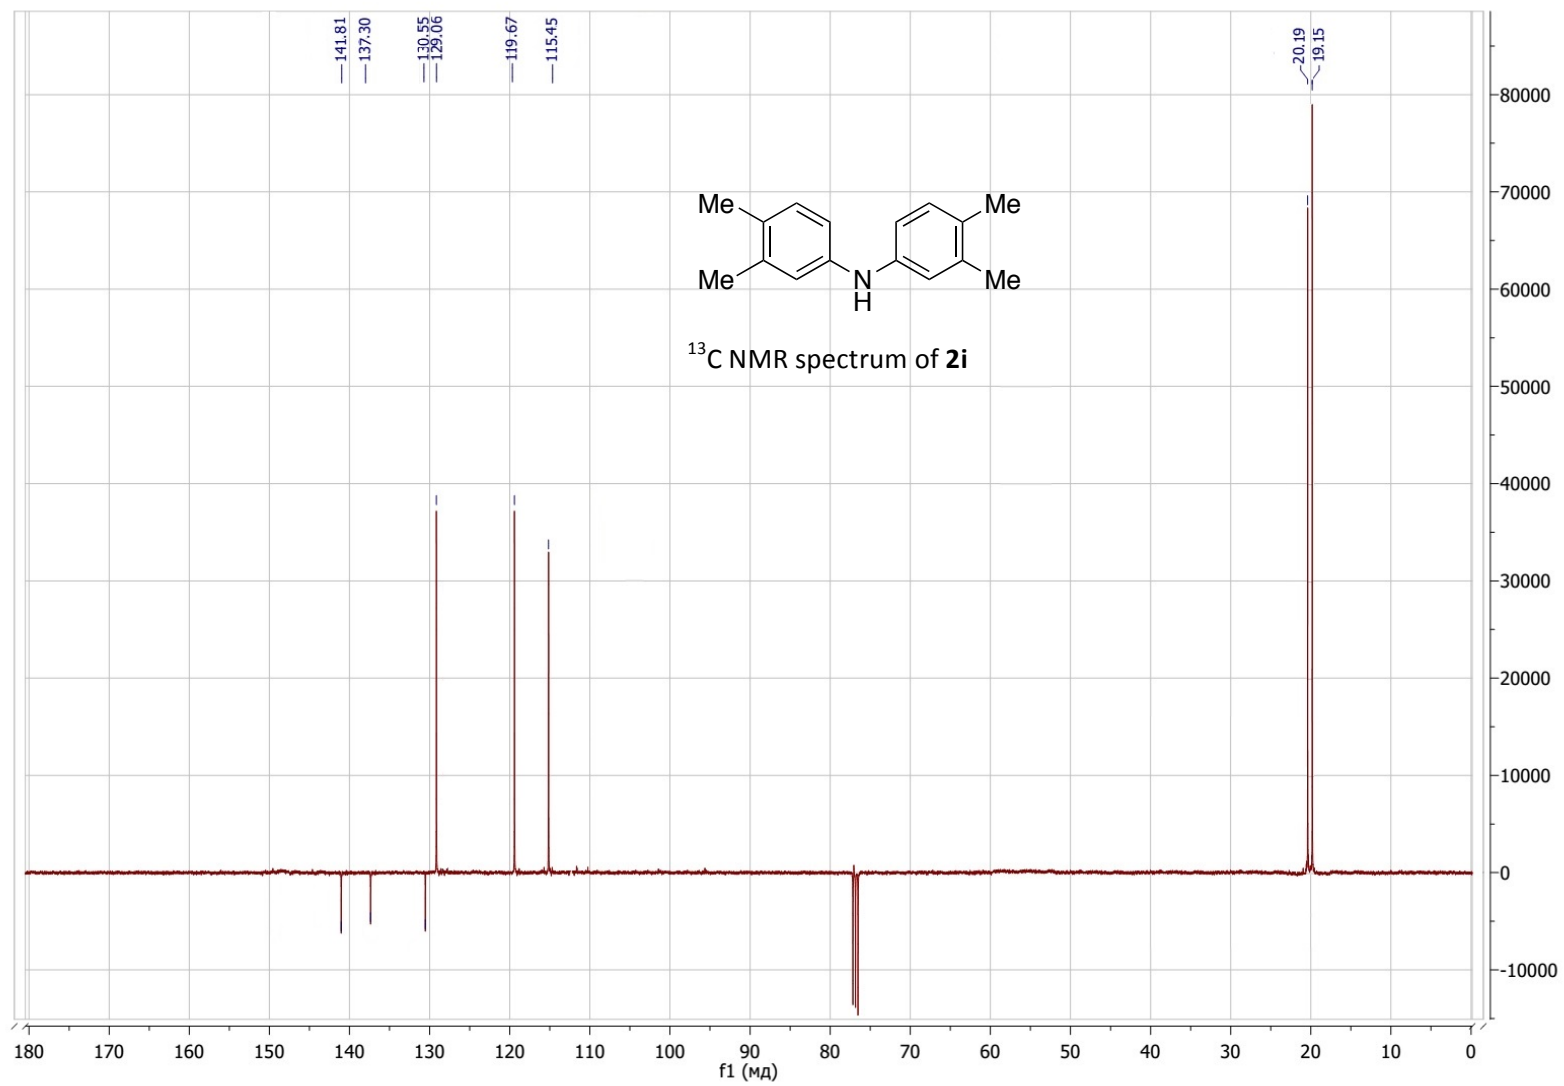

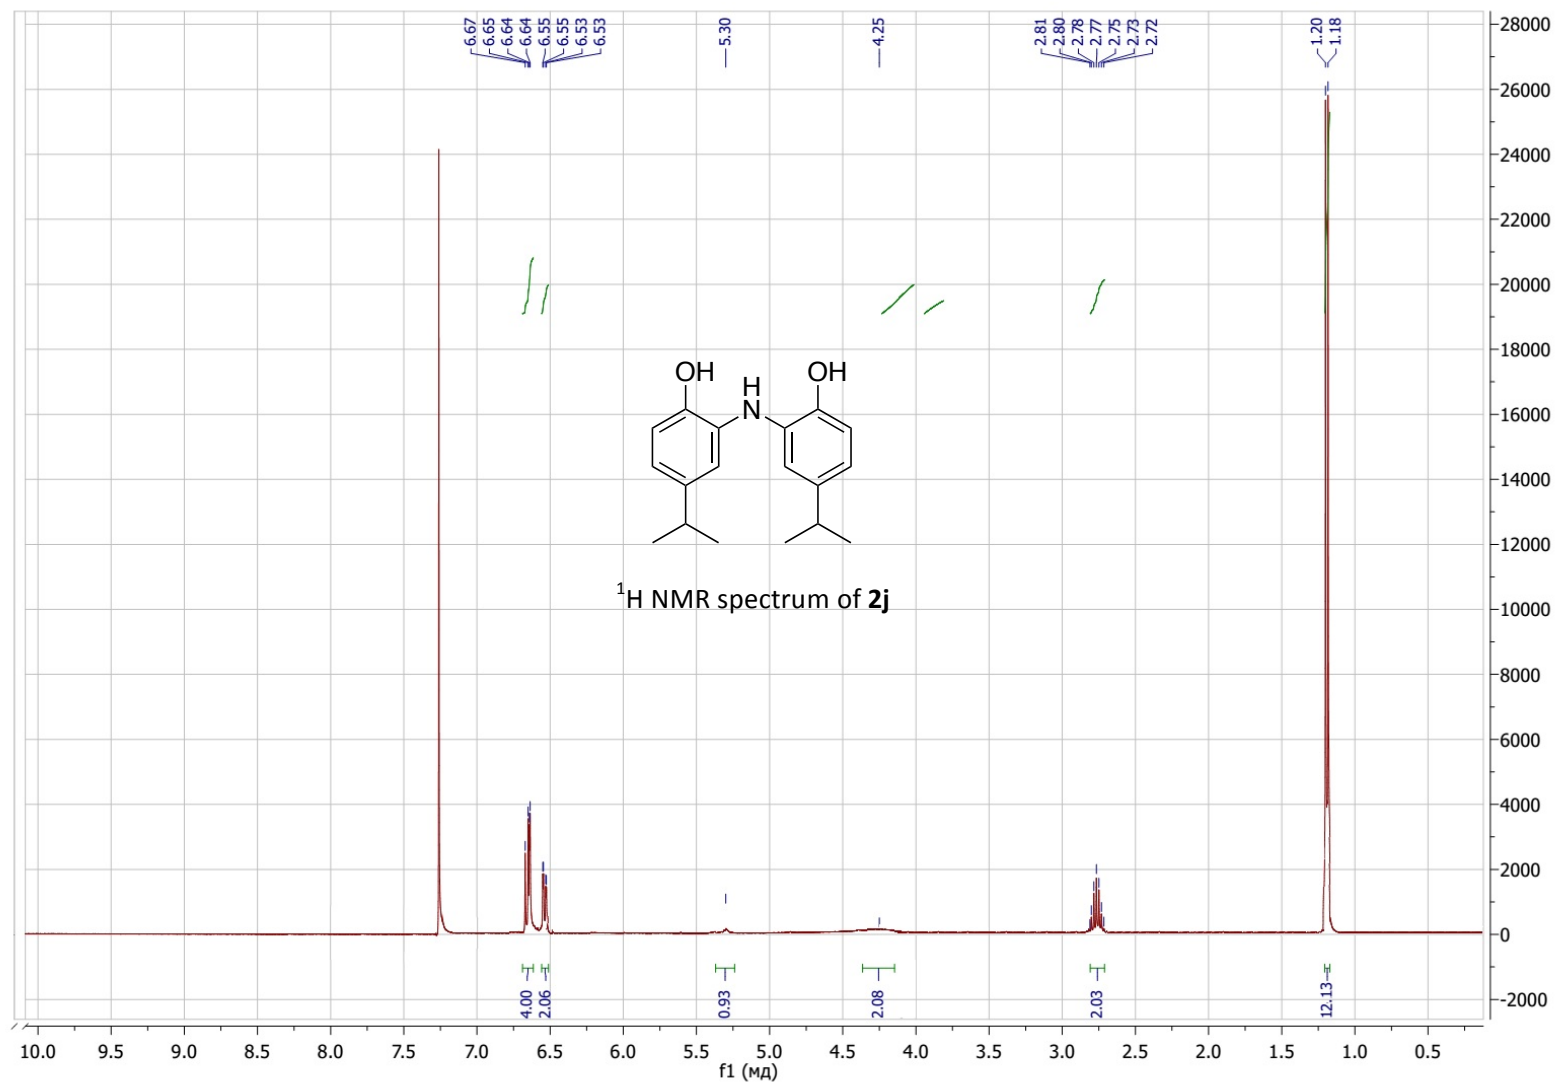

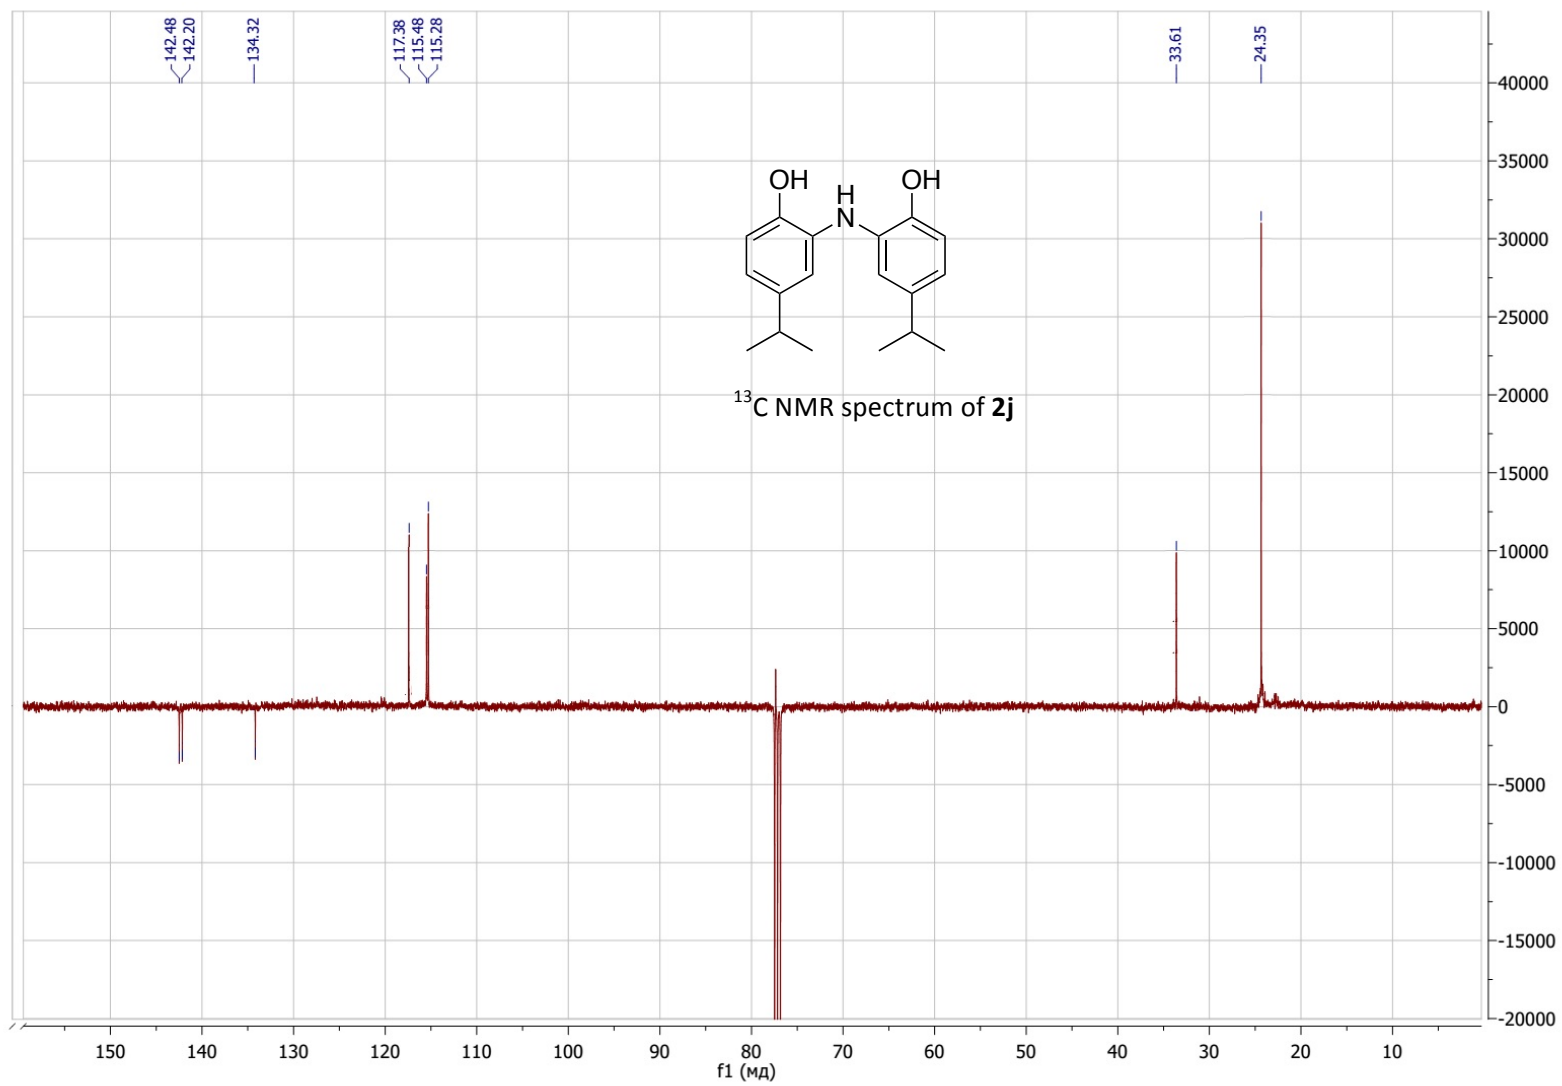

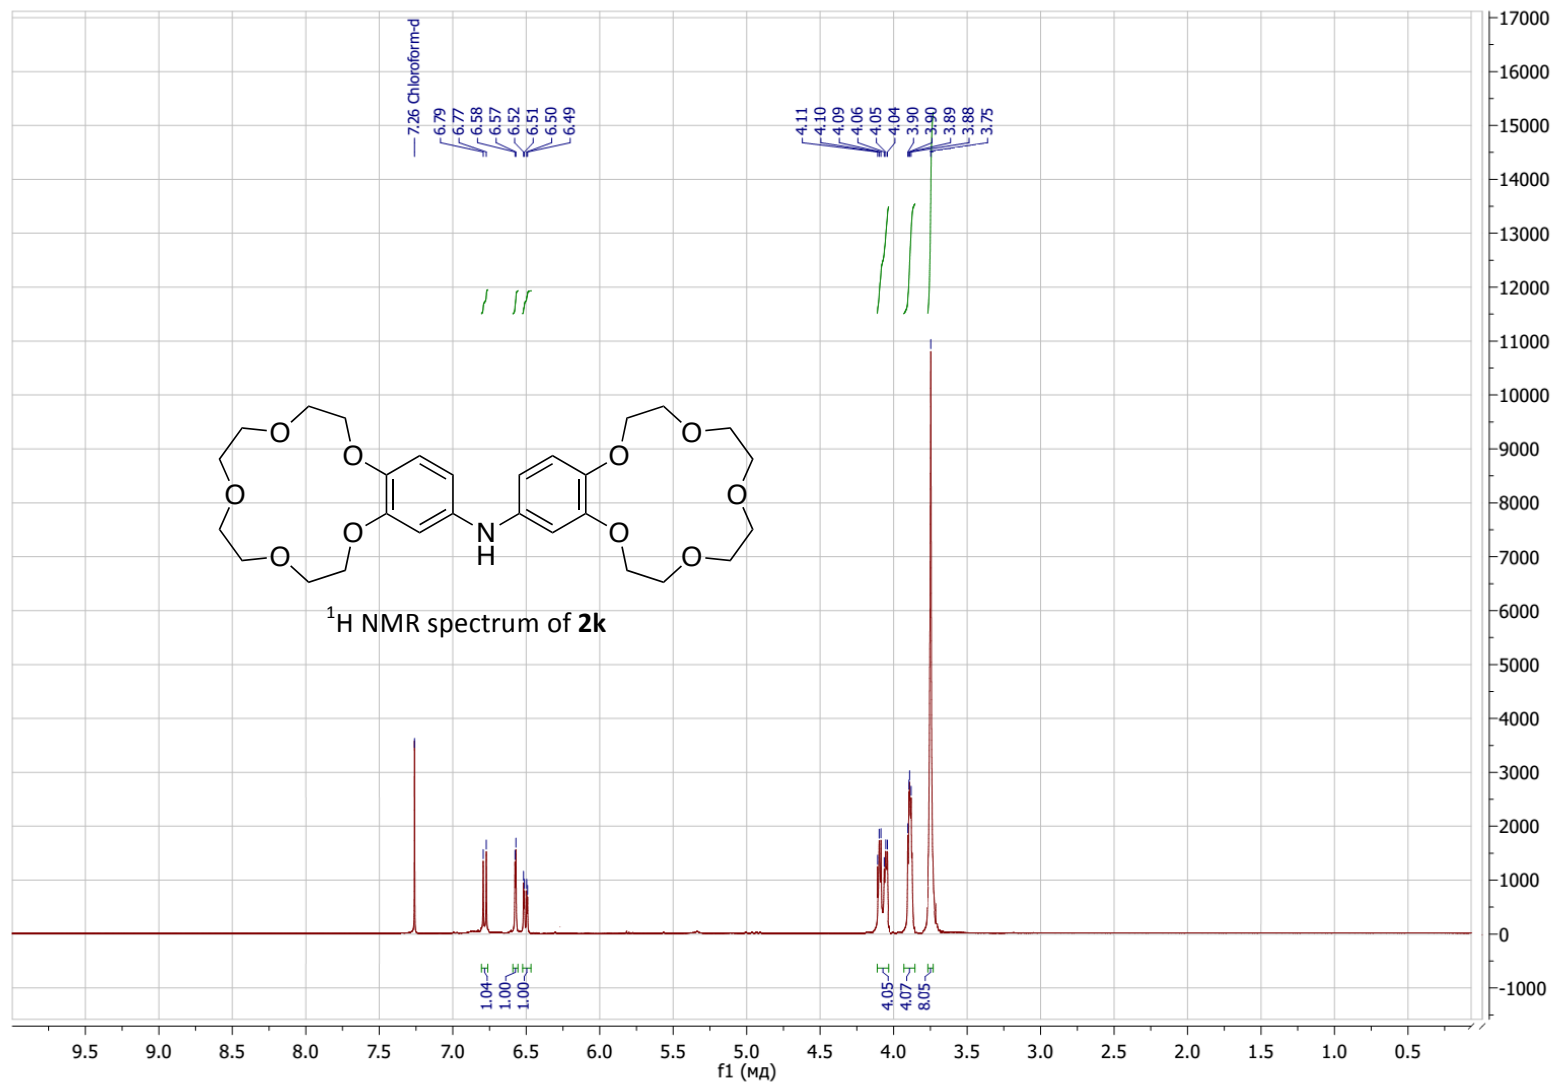

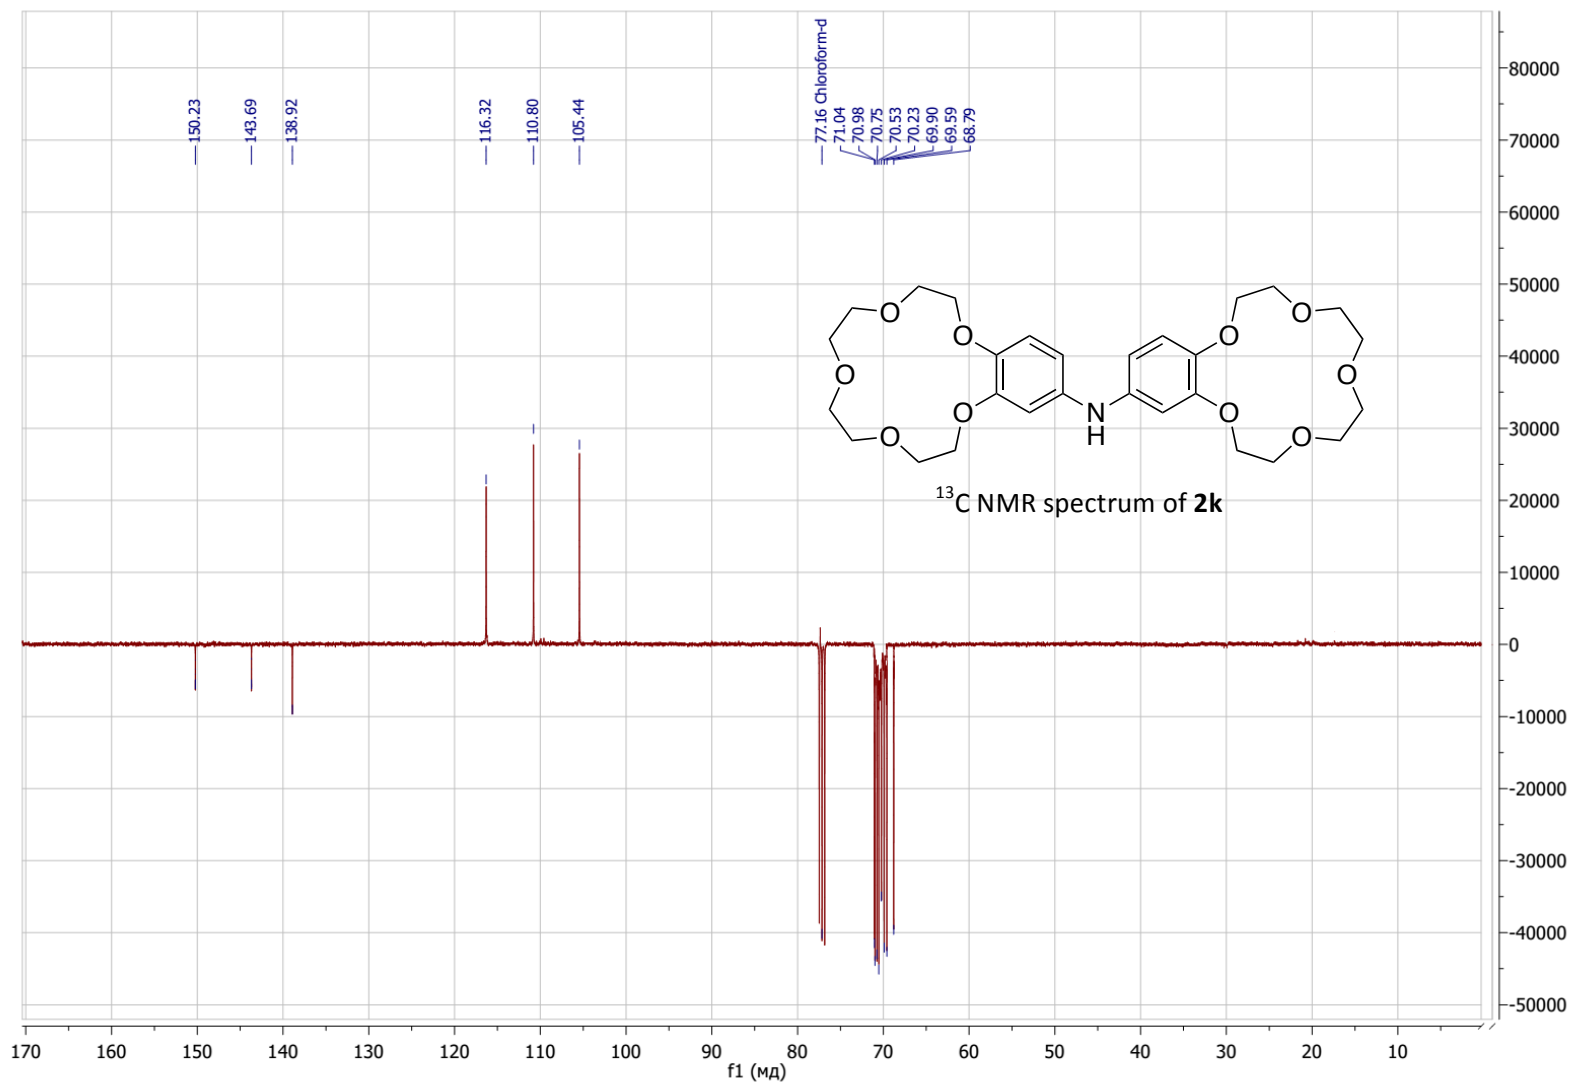

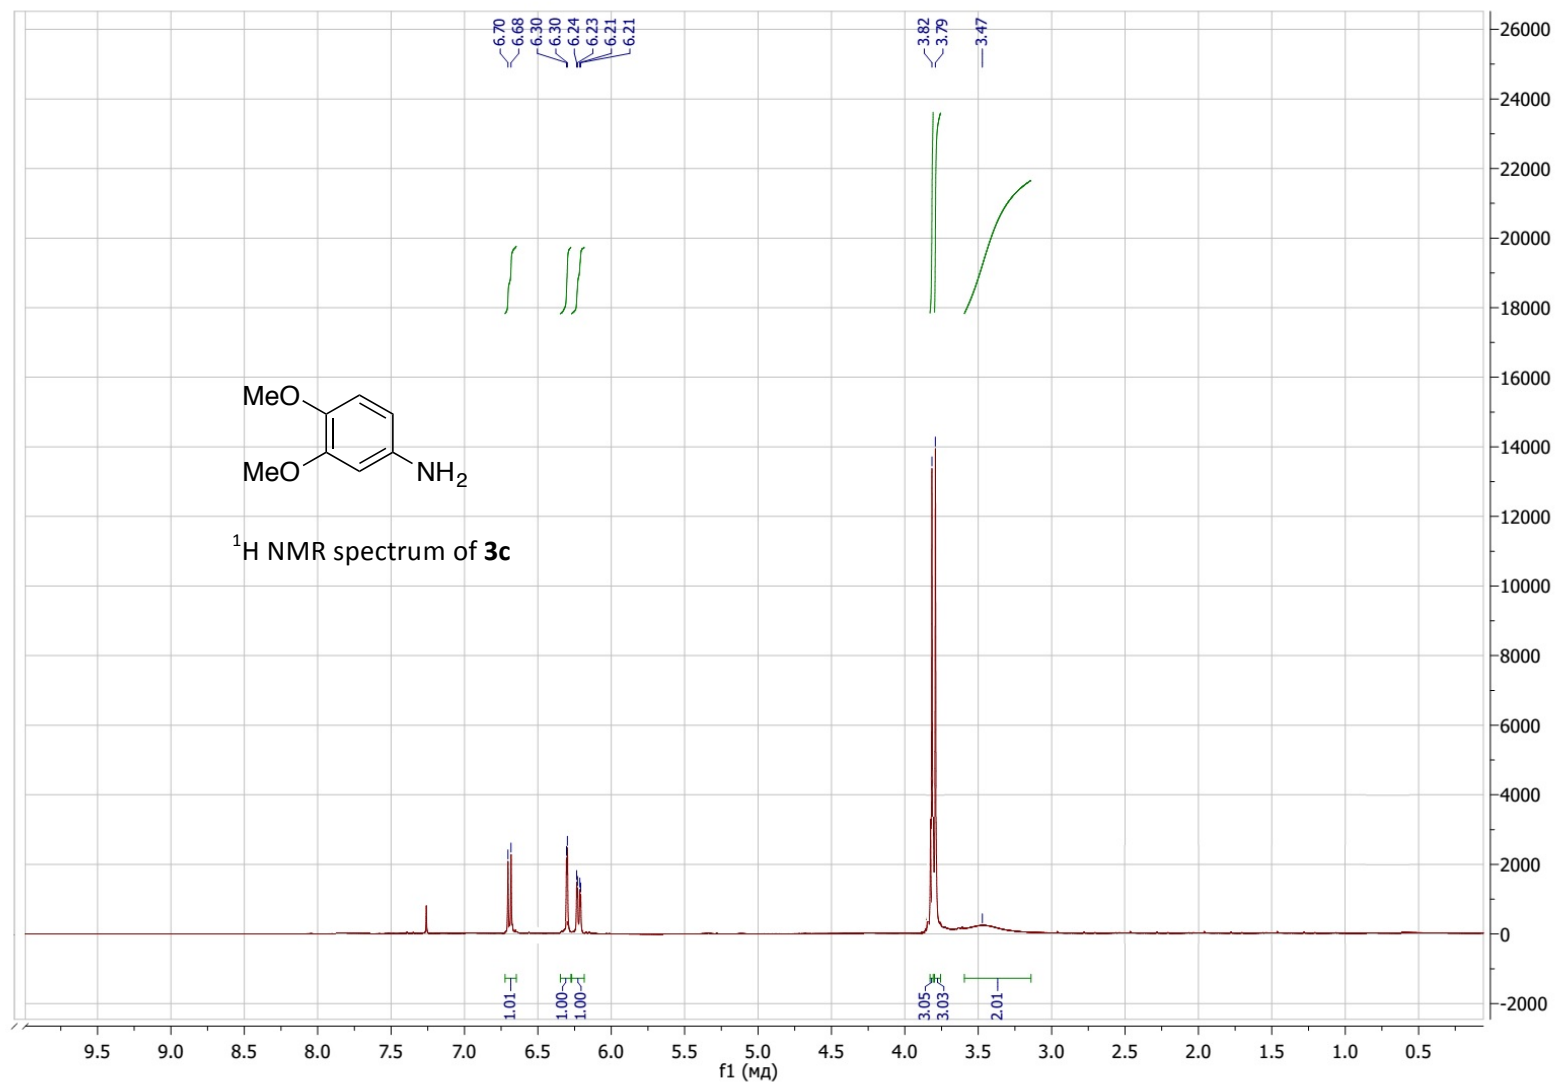



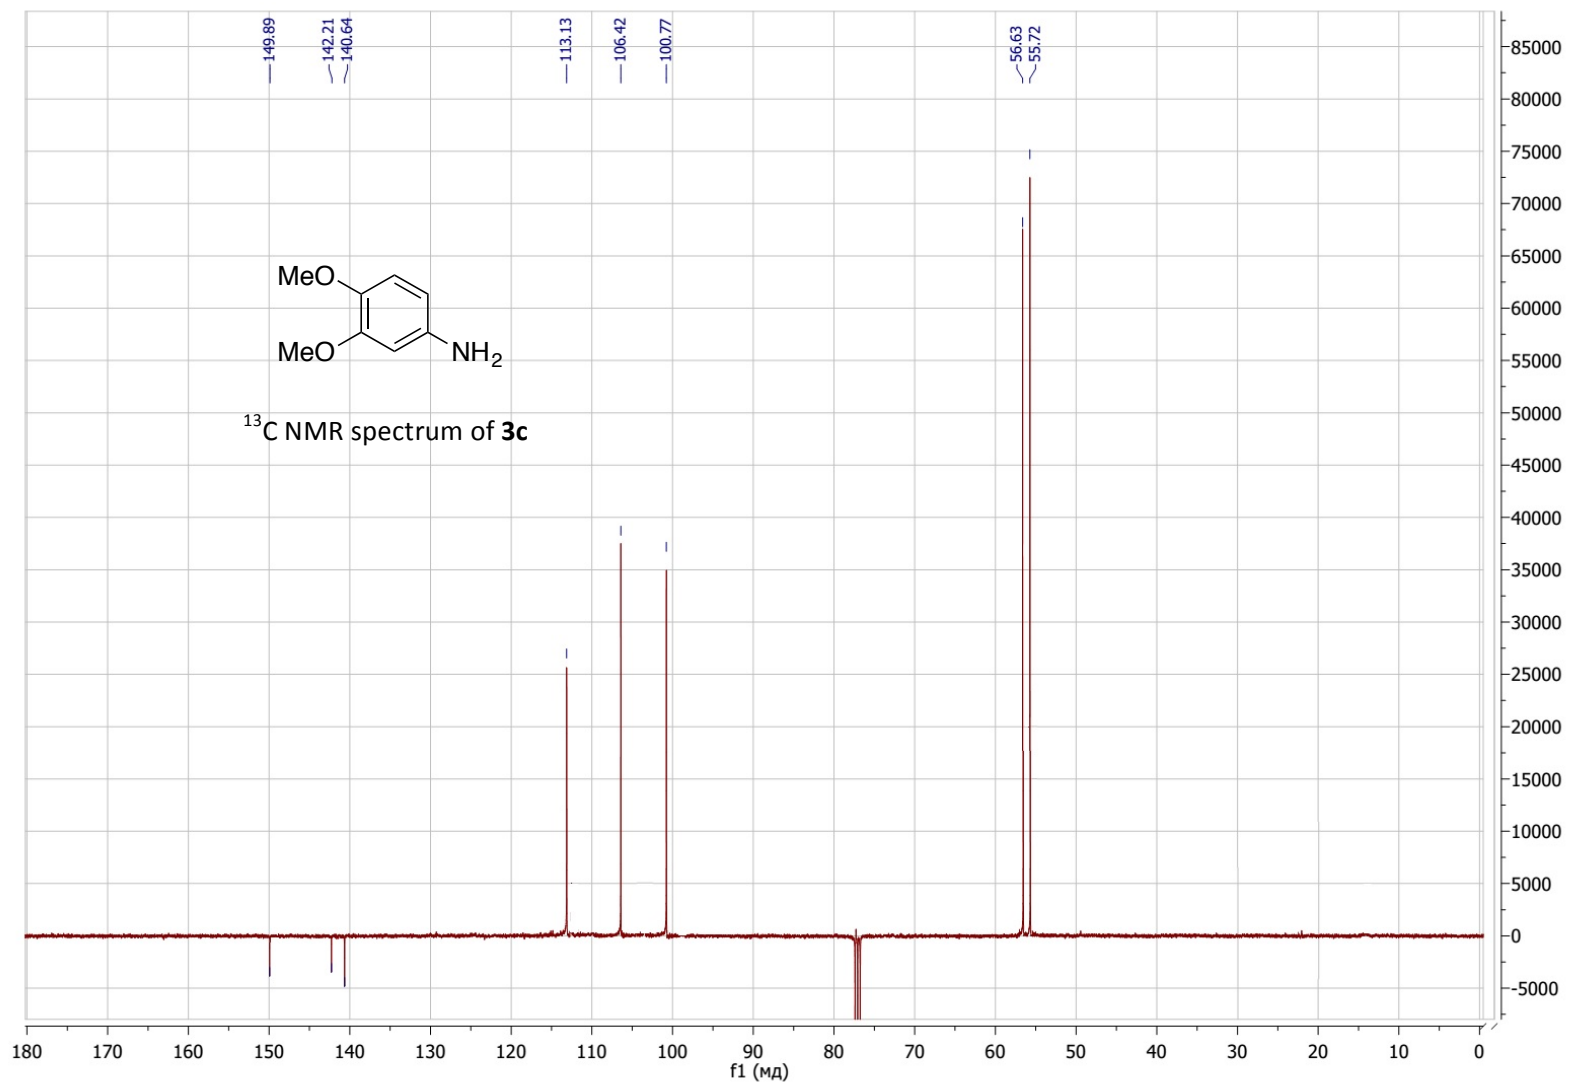

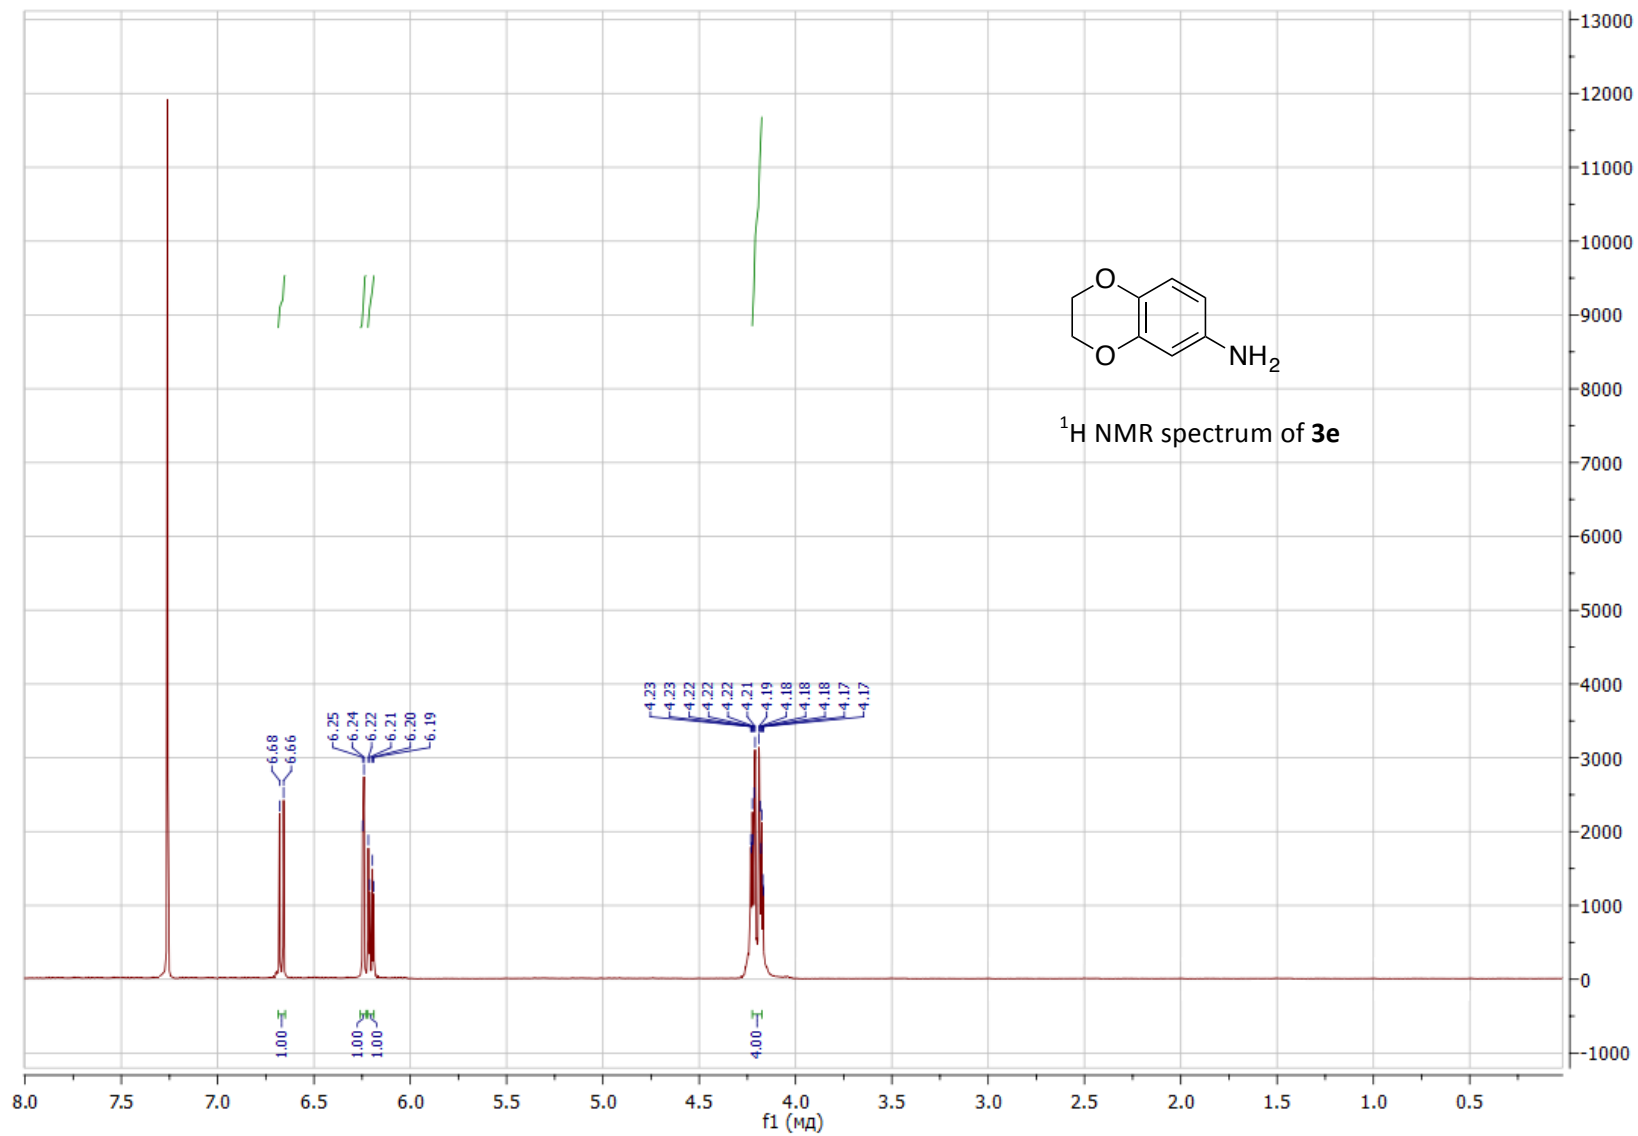

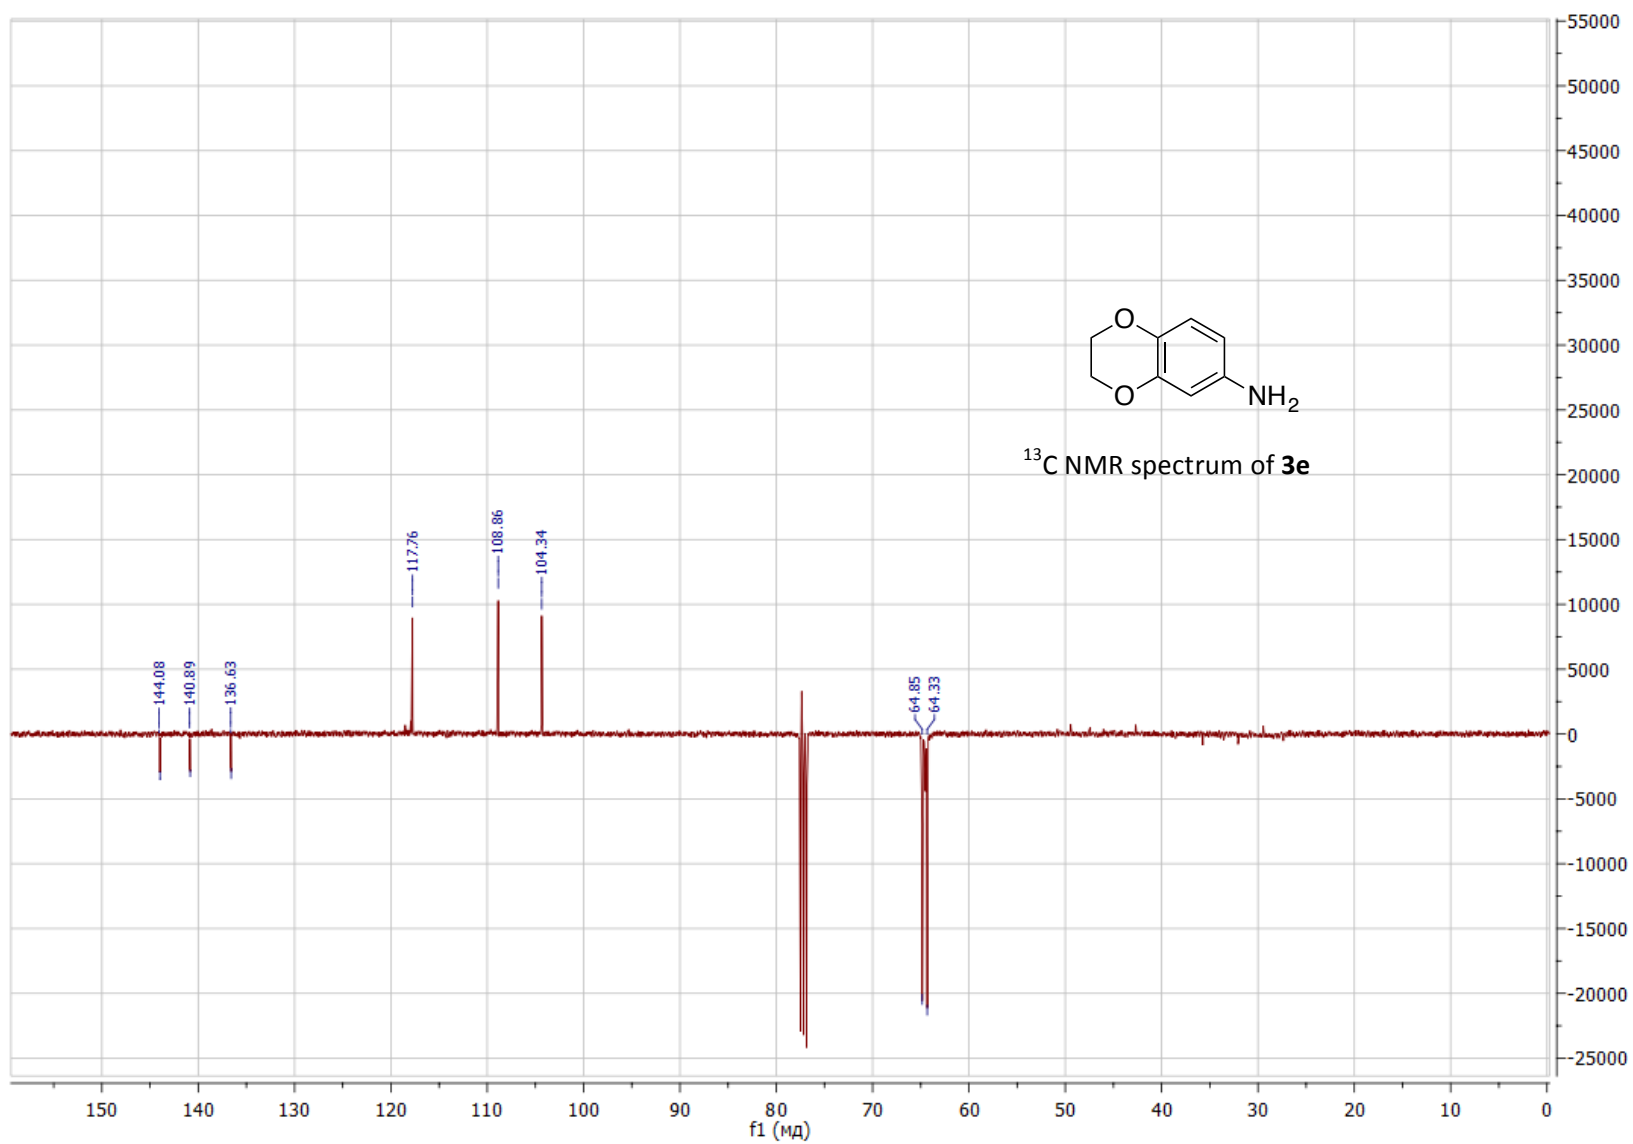

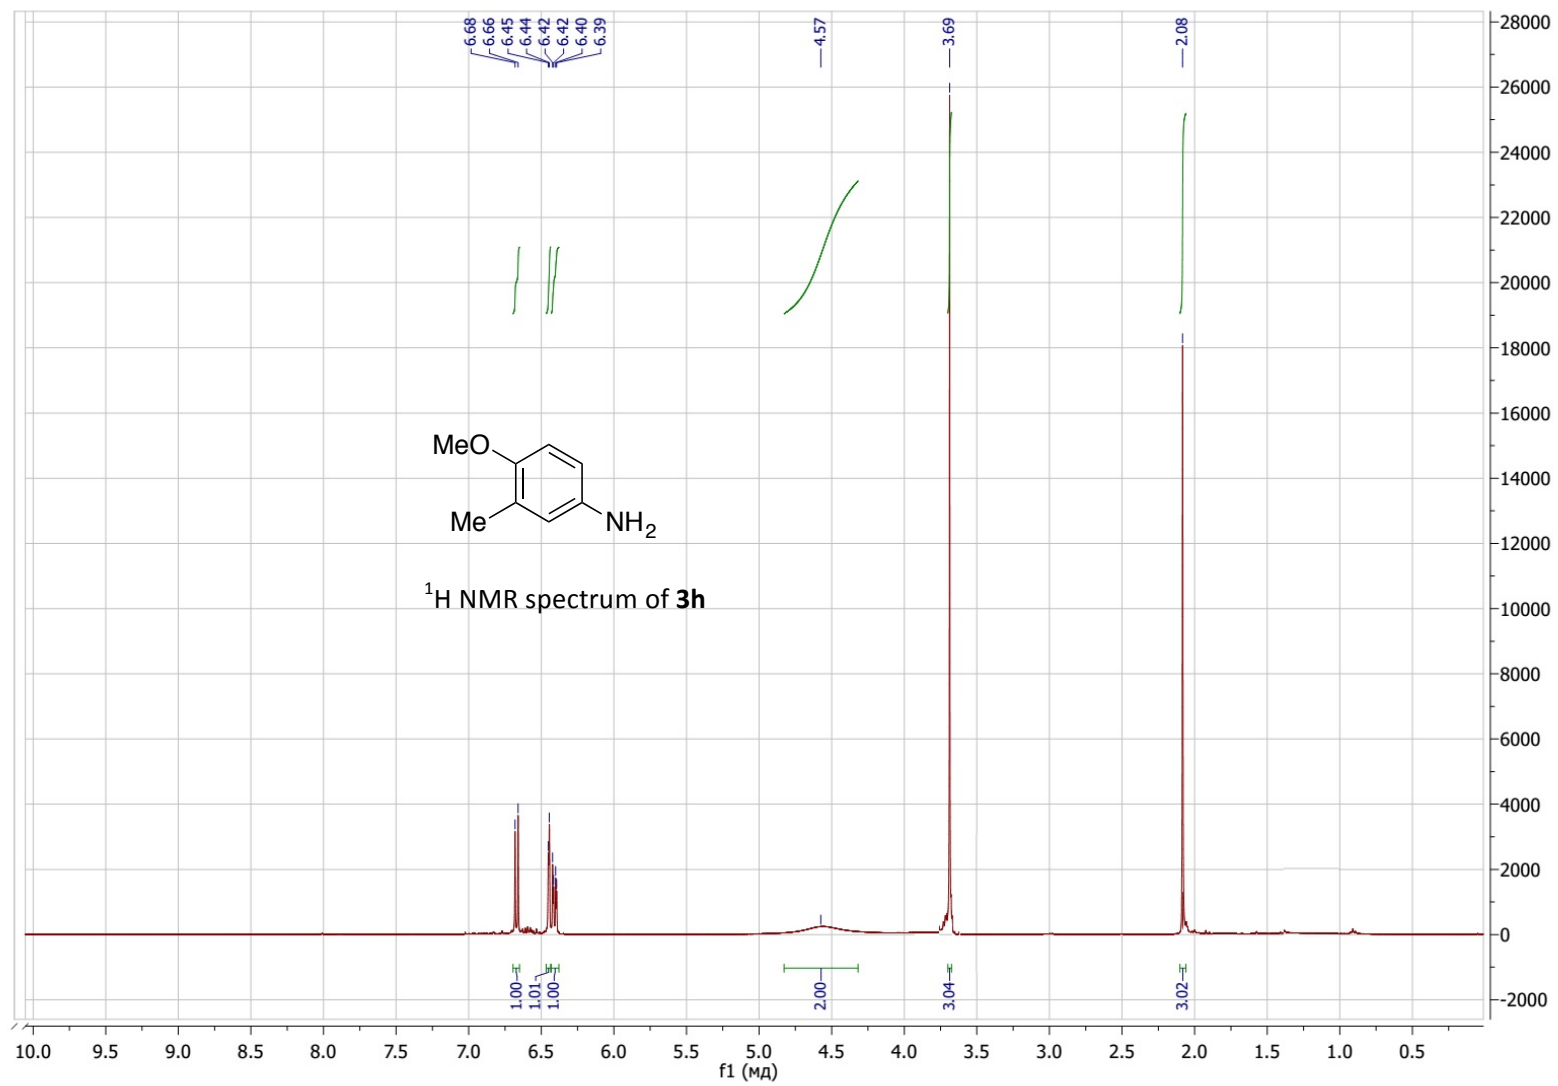

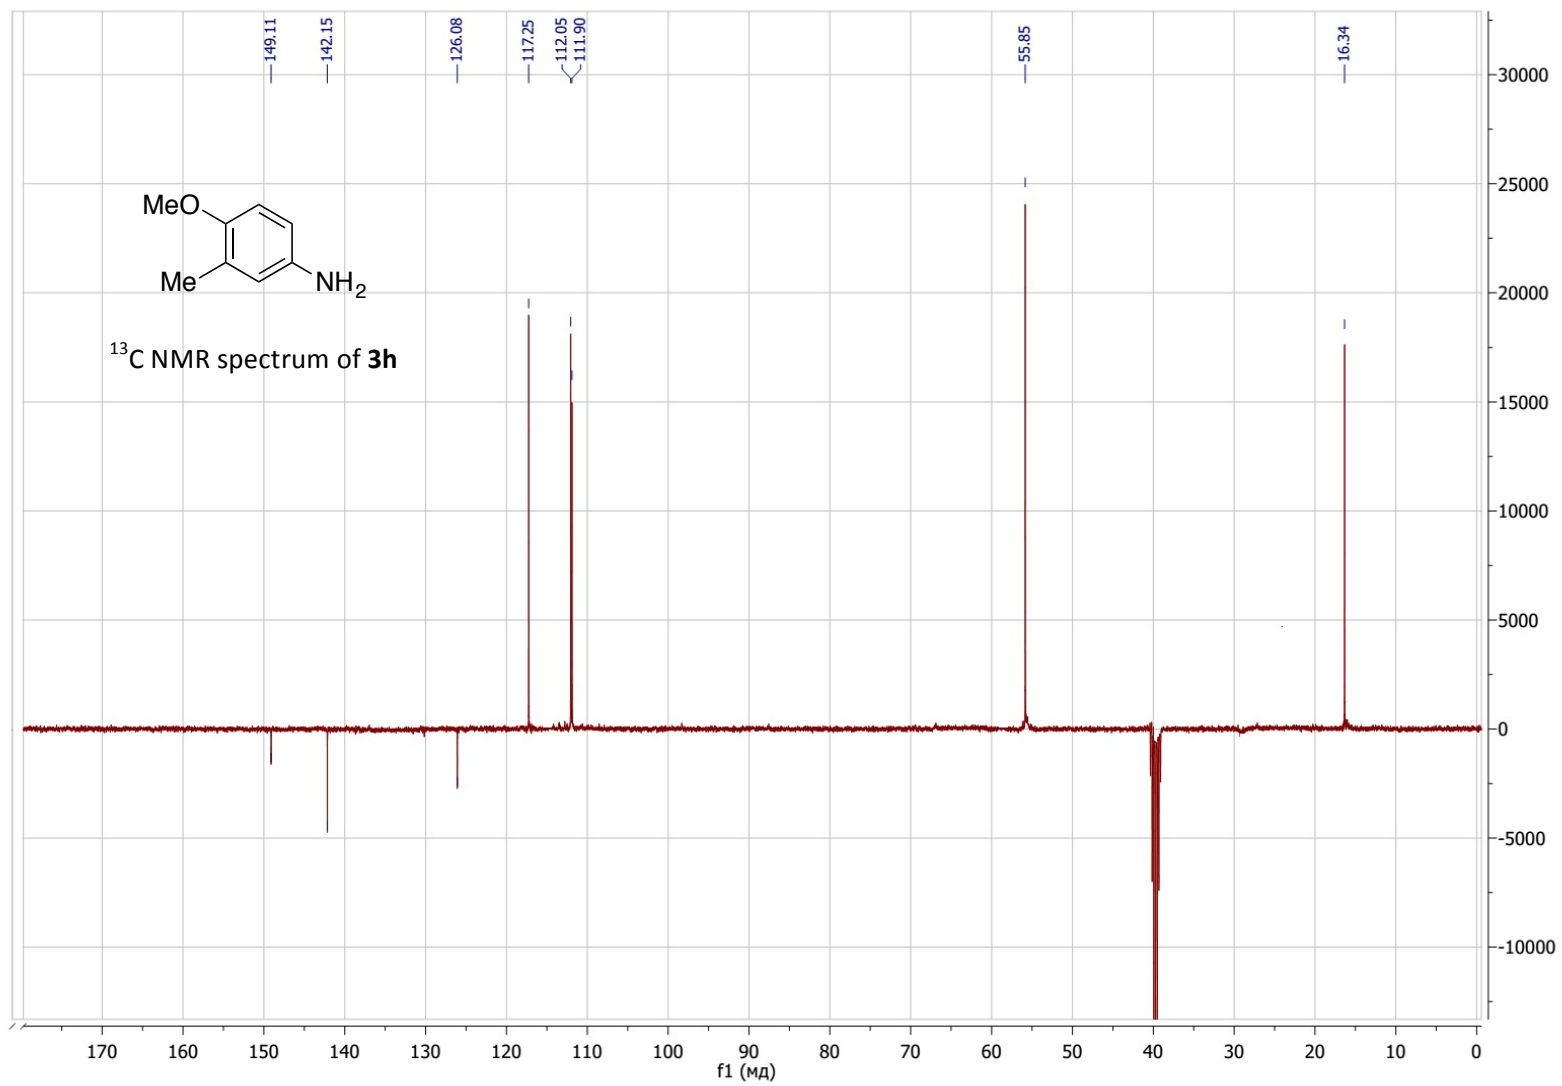

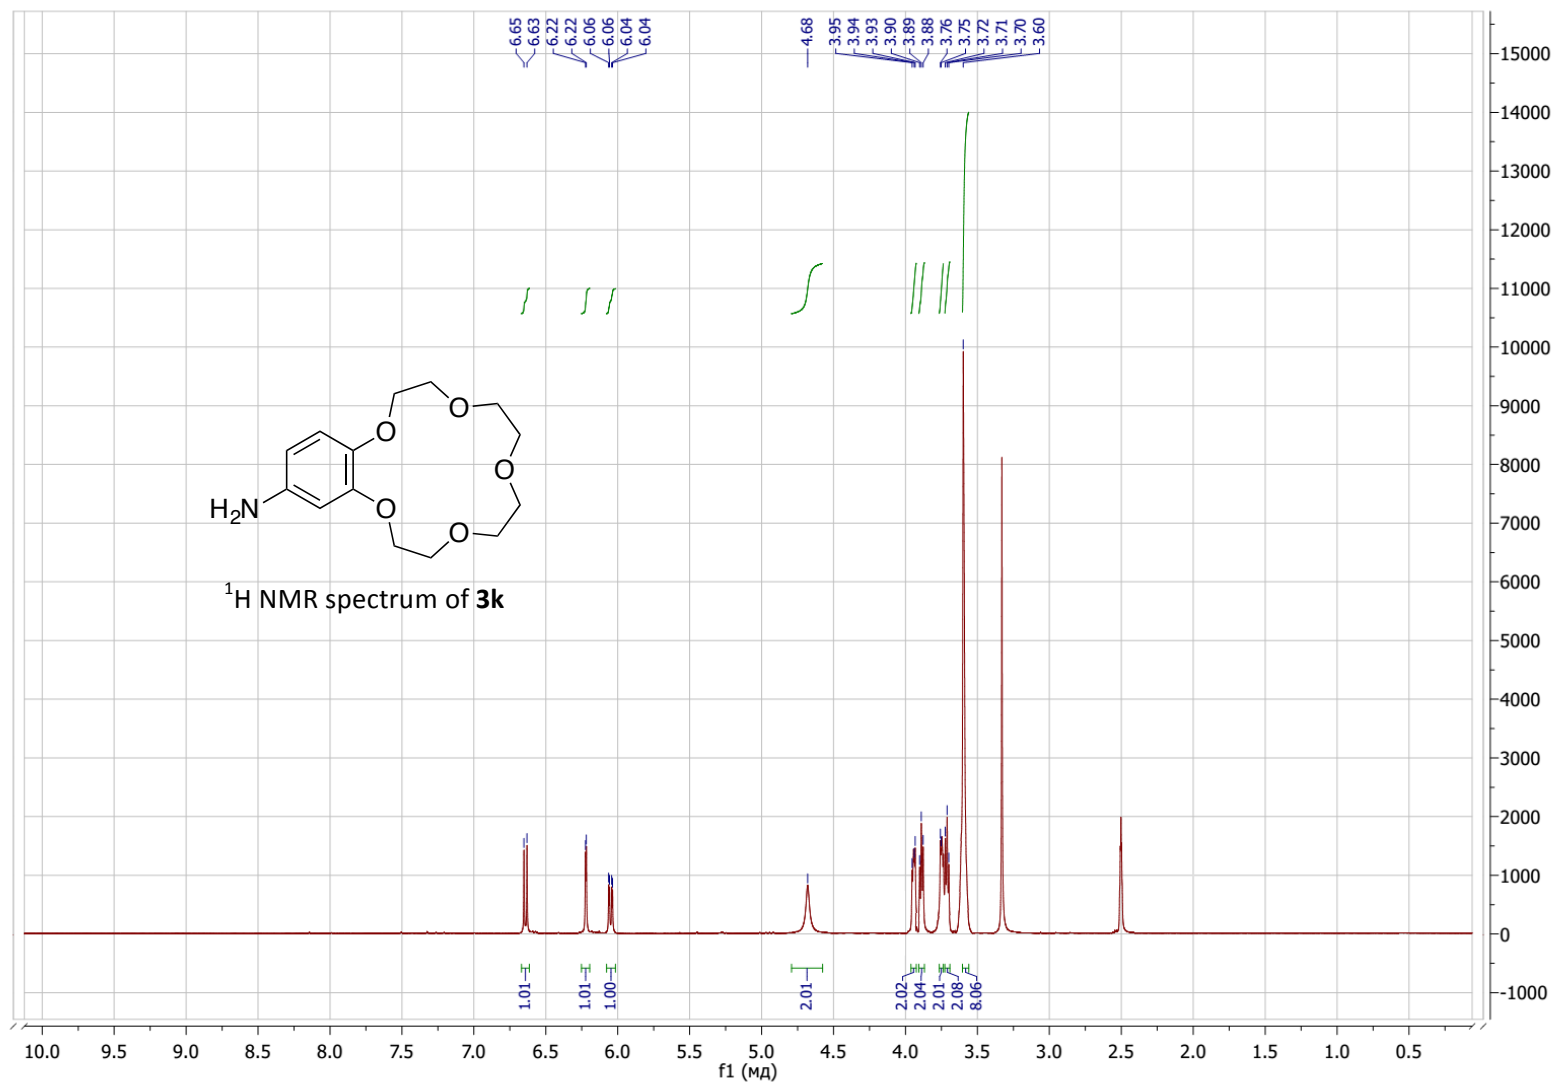

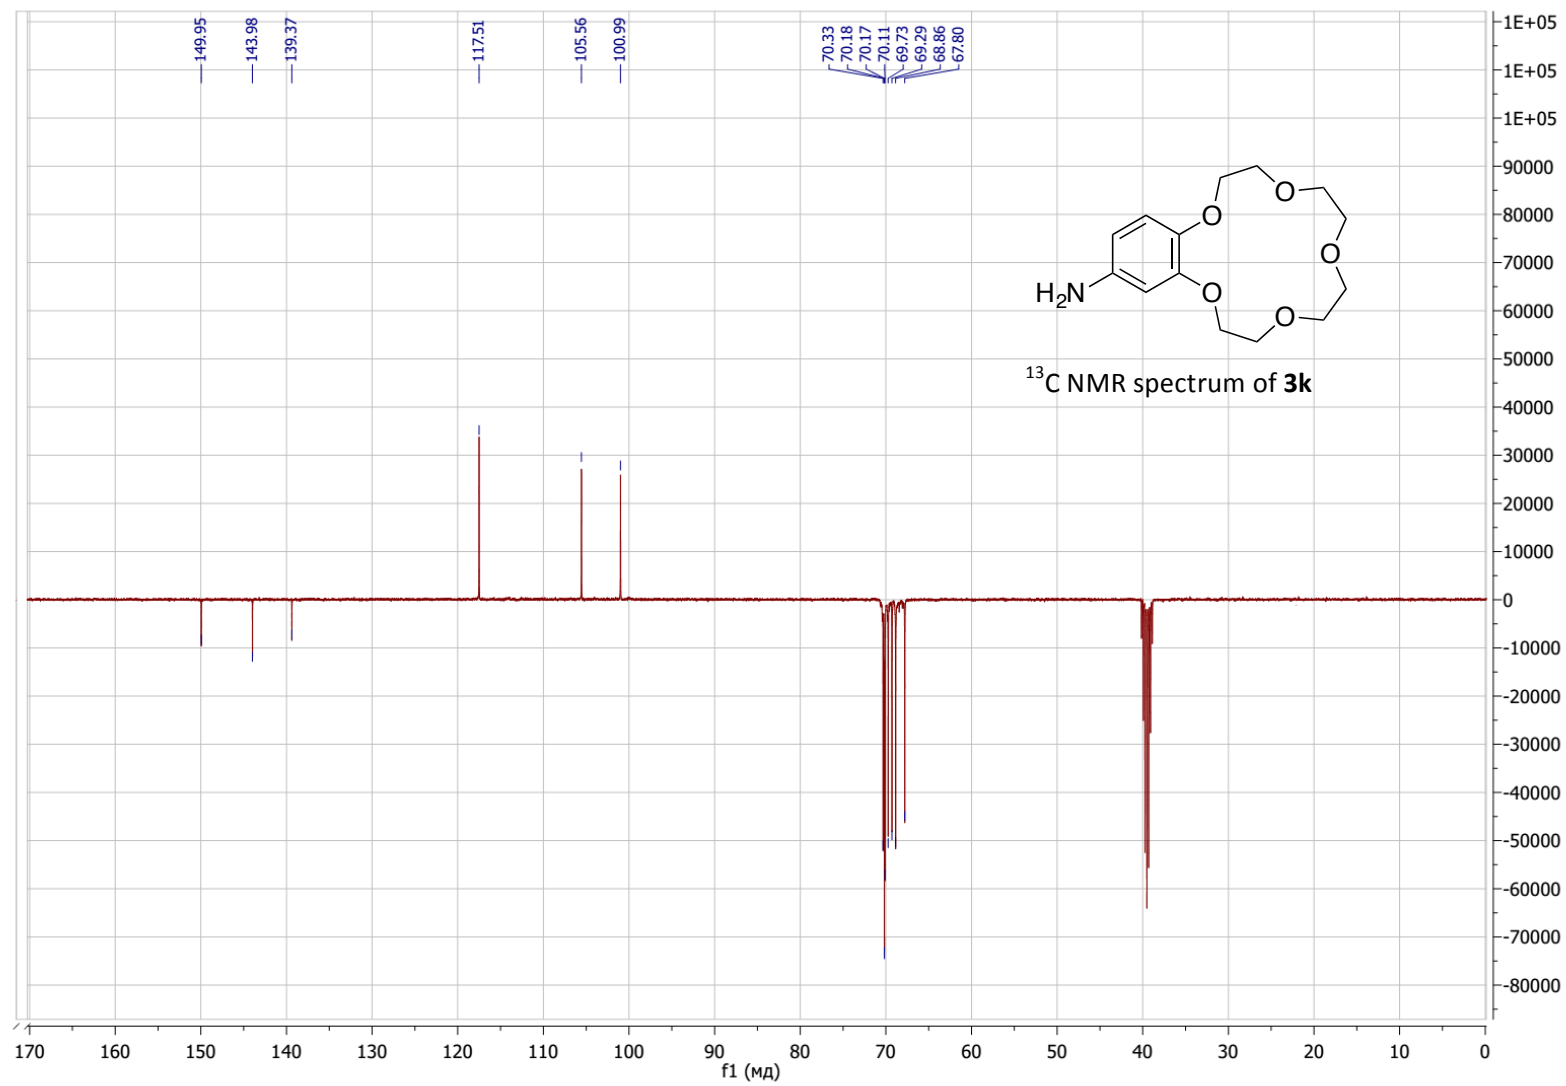

## HRMS Spectral Charts

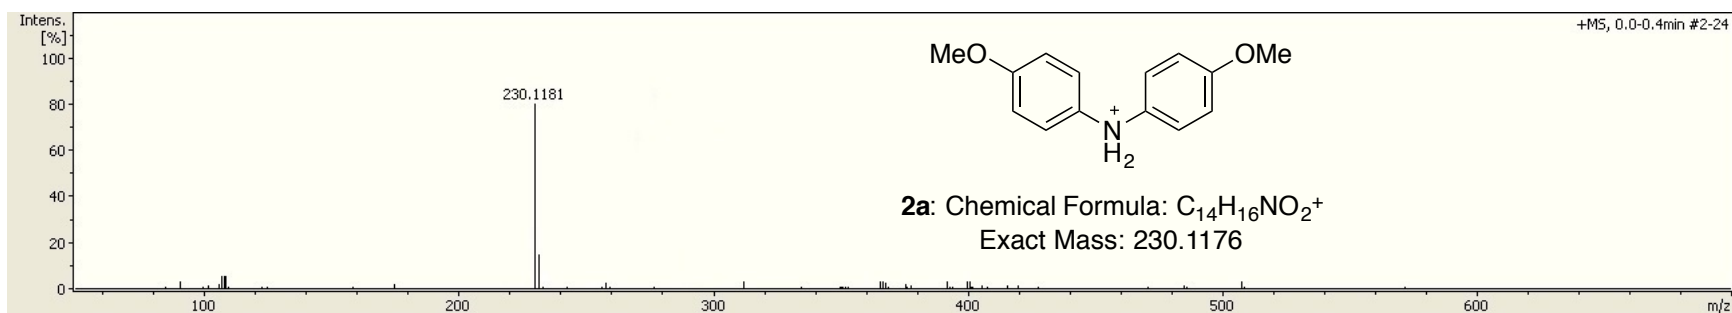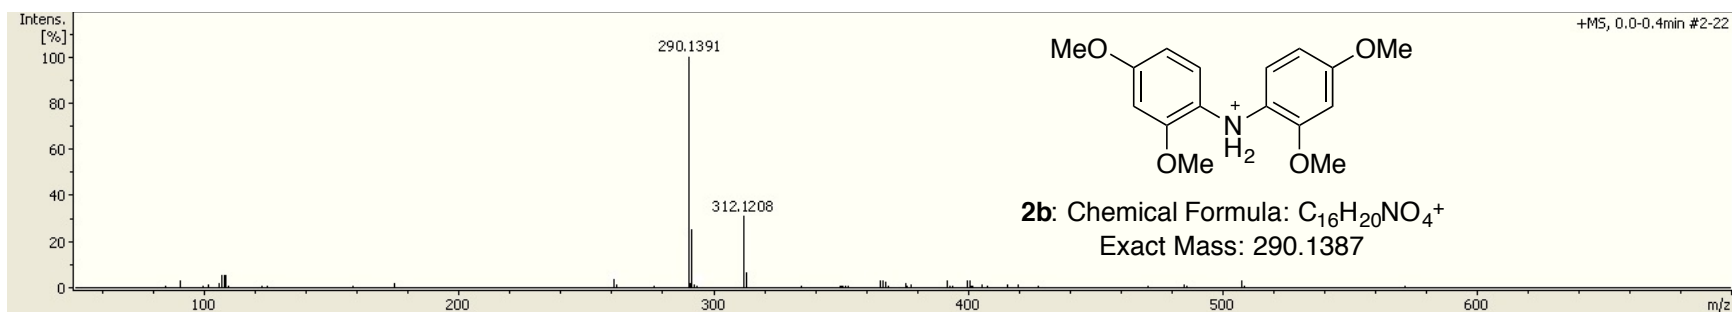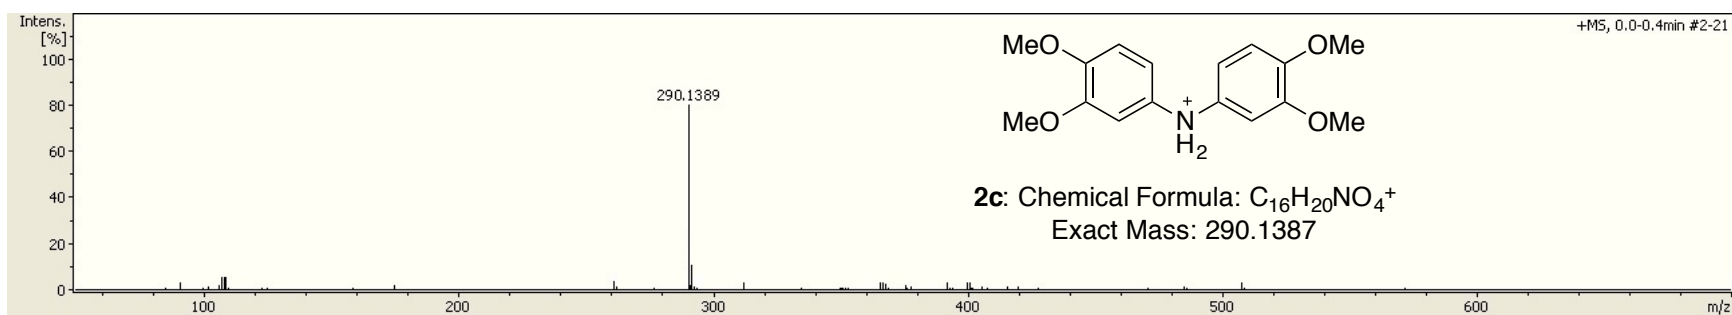



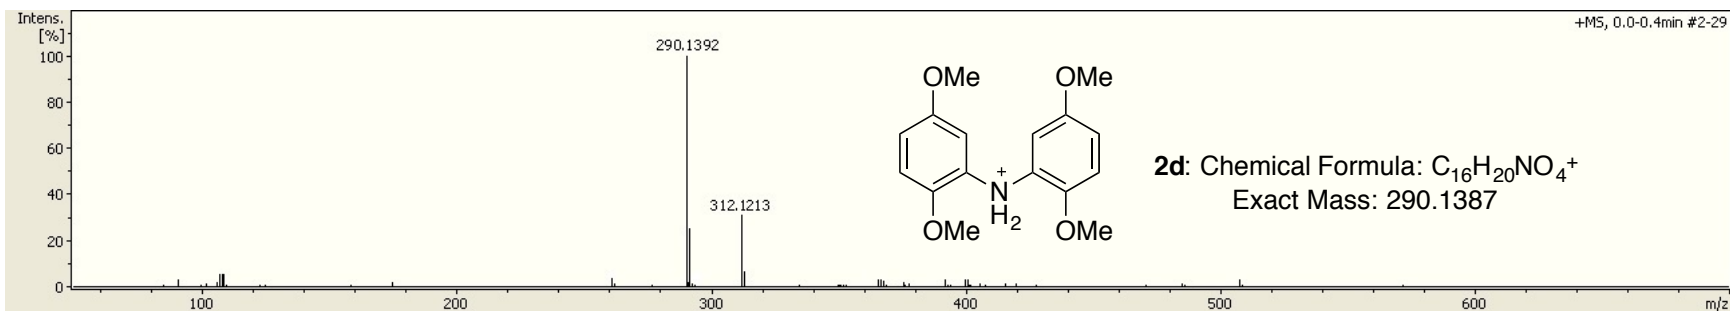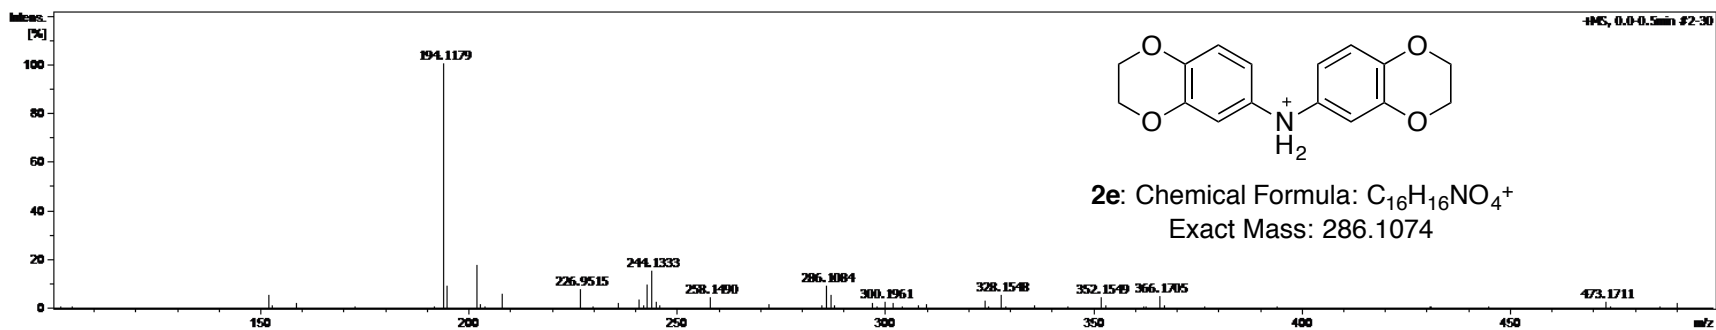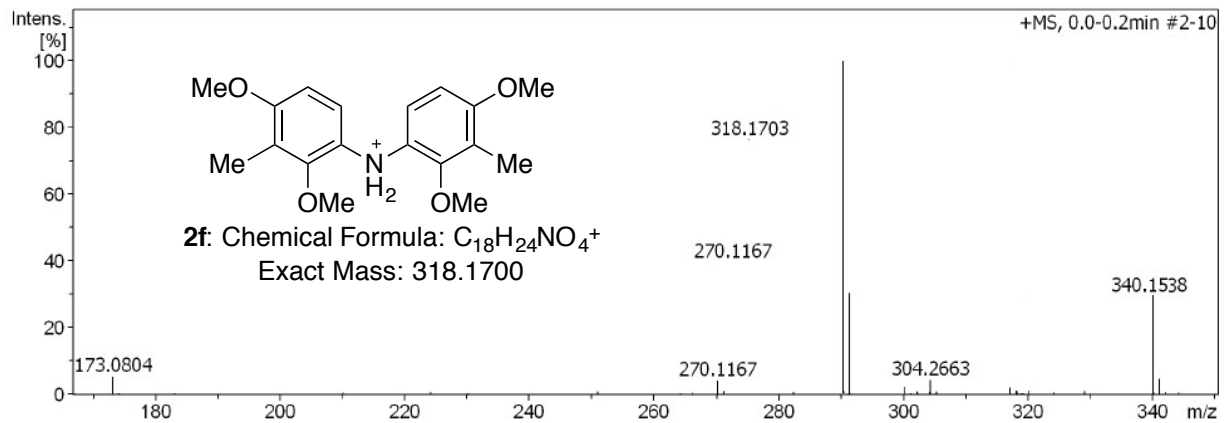

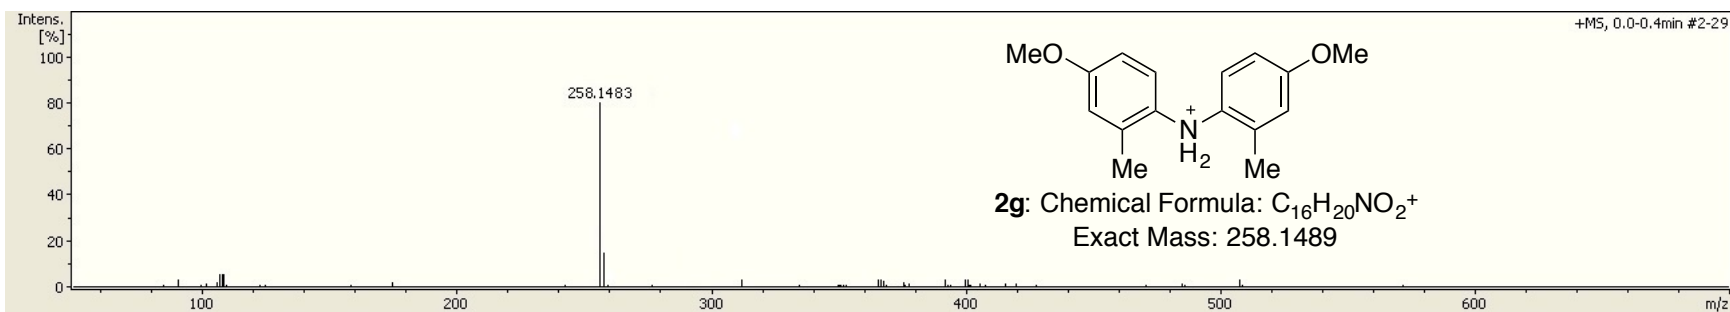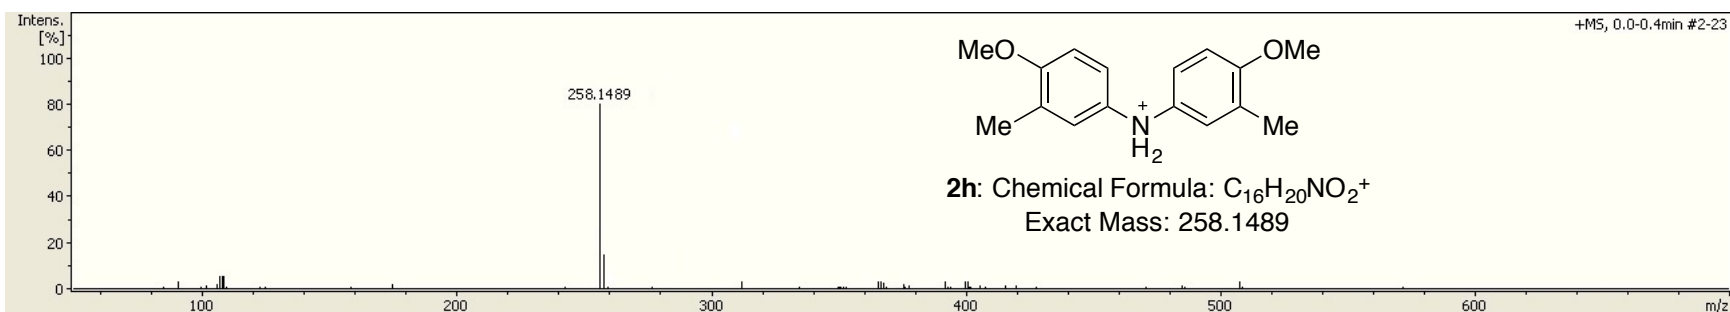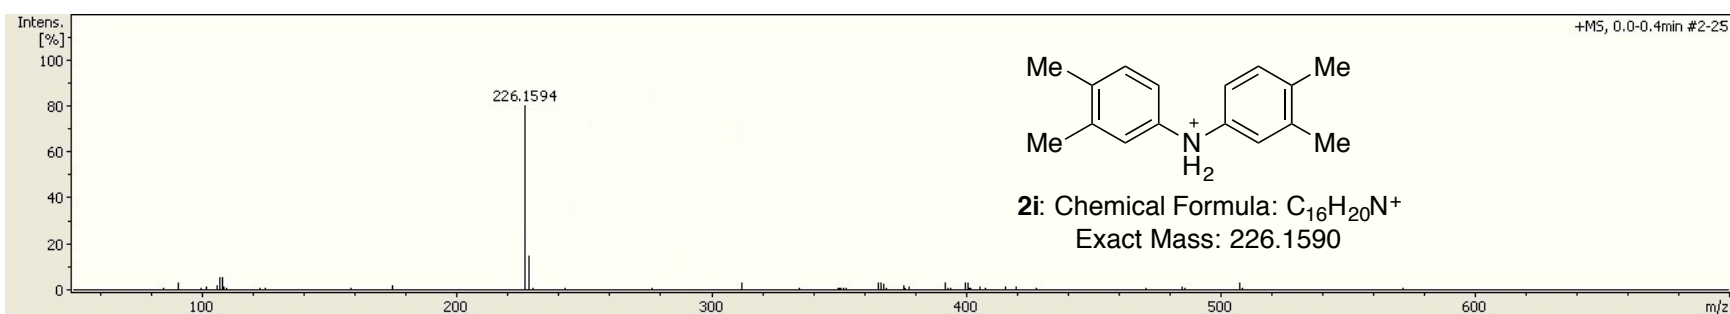

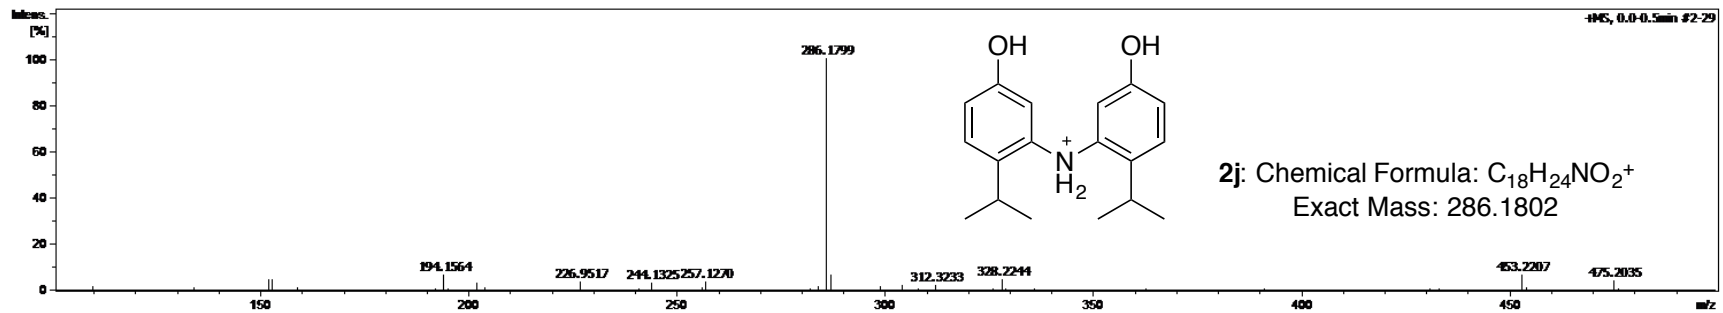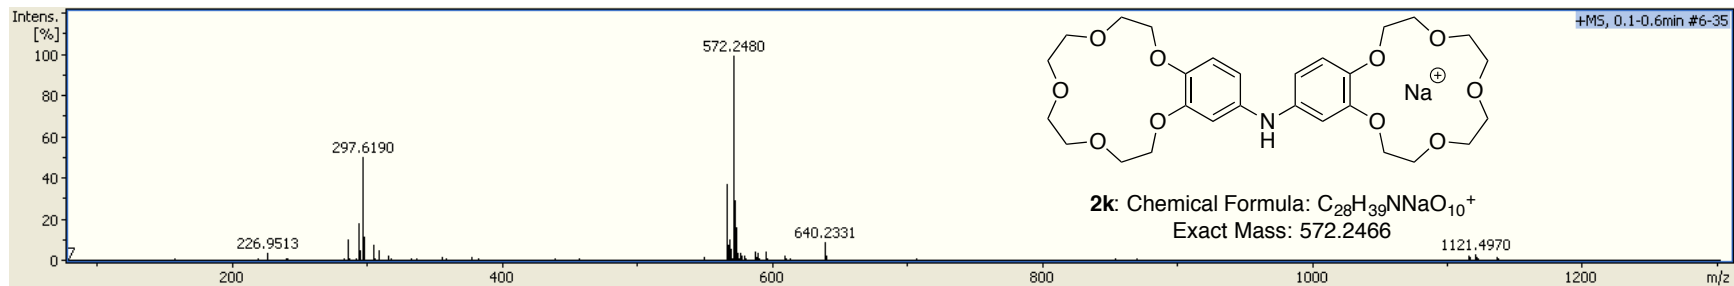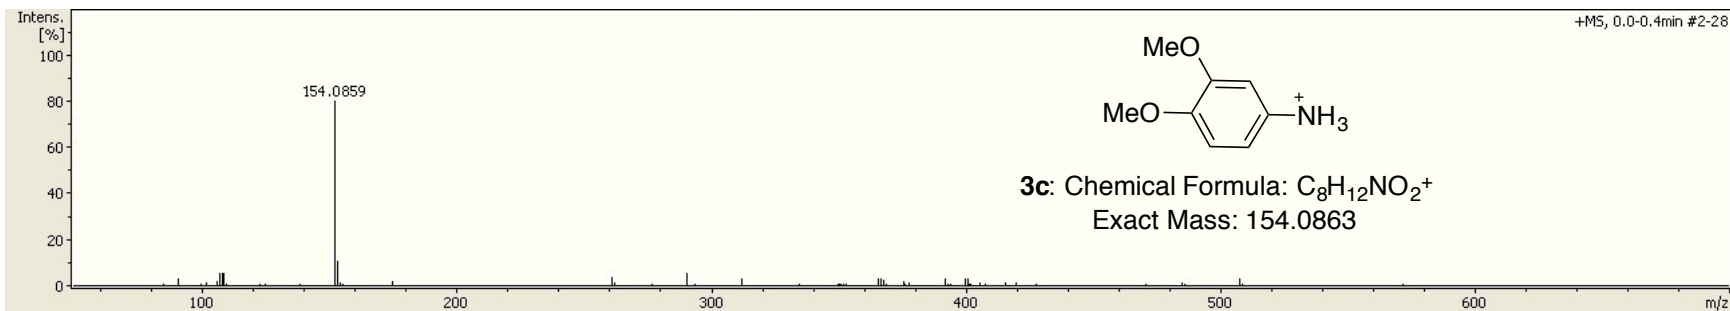

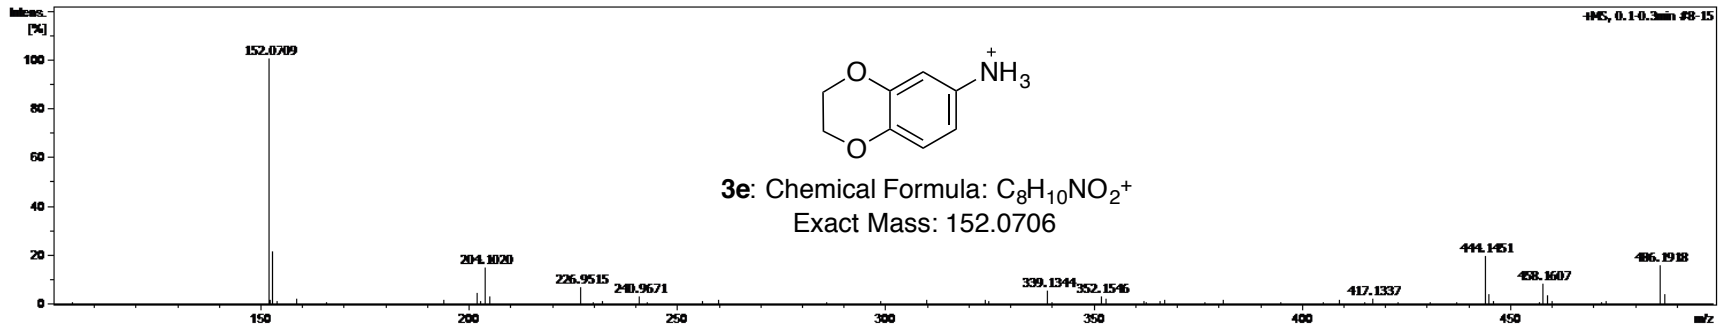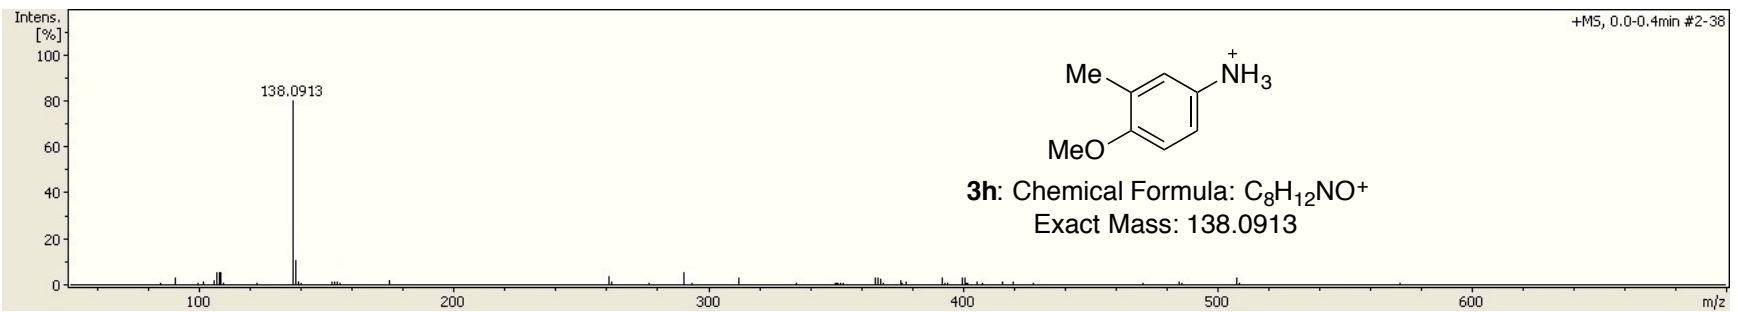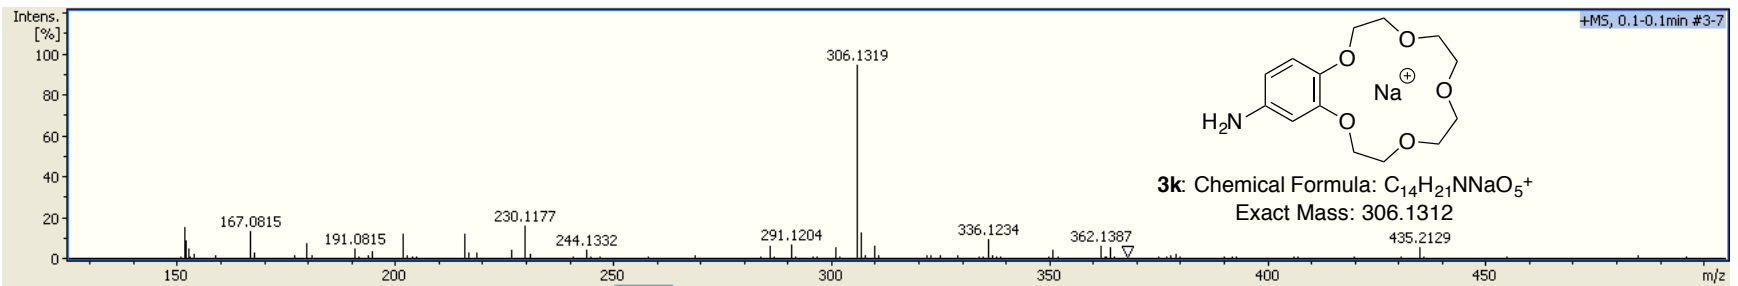

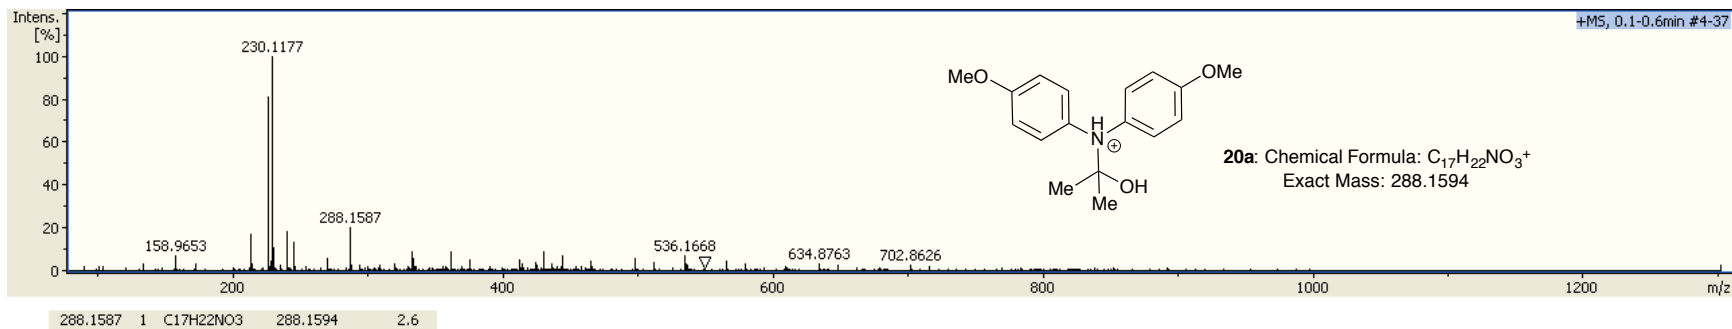

This HRMS spectrum is obtained for crude mixture at the late stages of reaction between anisole and 2-nitropropane. Signal at 288.1587 (2.4 ppm) corresponds to hemiaminal **20a**.

## ORTEP Drawings for X-Ray Crystallography

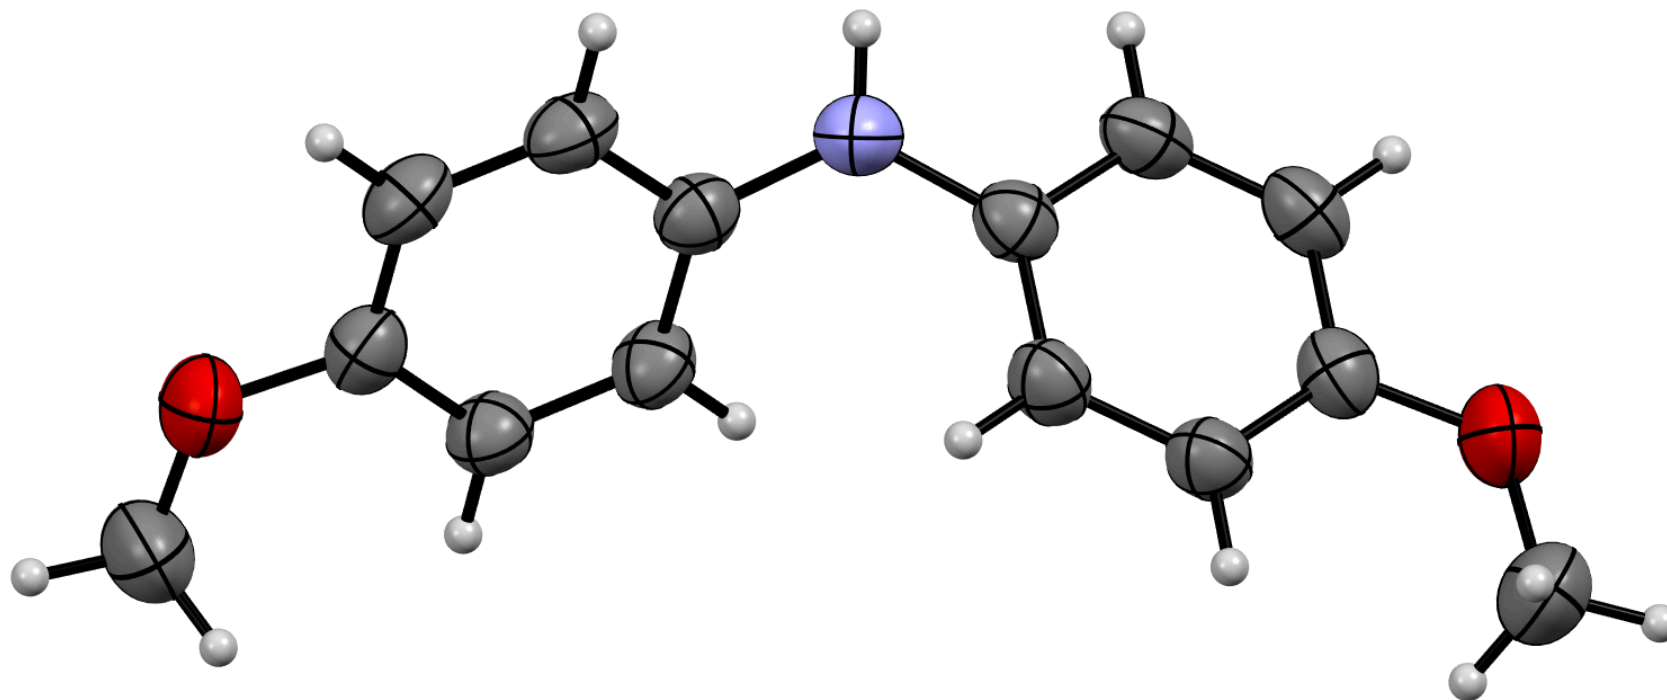

**Figure 1.** ORTEP drawing of bis(4-methoxyphenyl)amine (**2a**) (CCDC 1417939) showing 50% probability amplitude displacement ellipsoids.

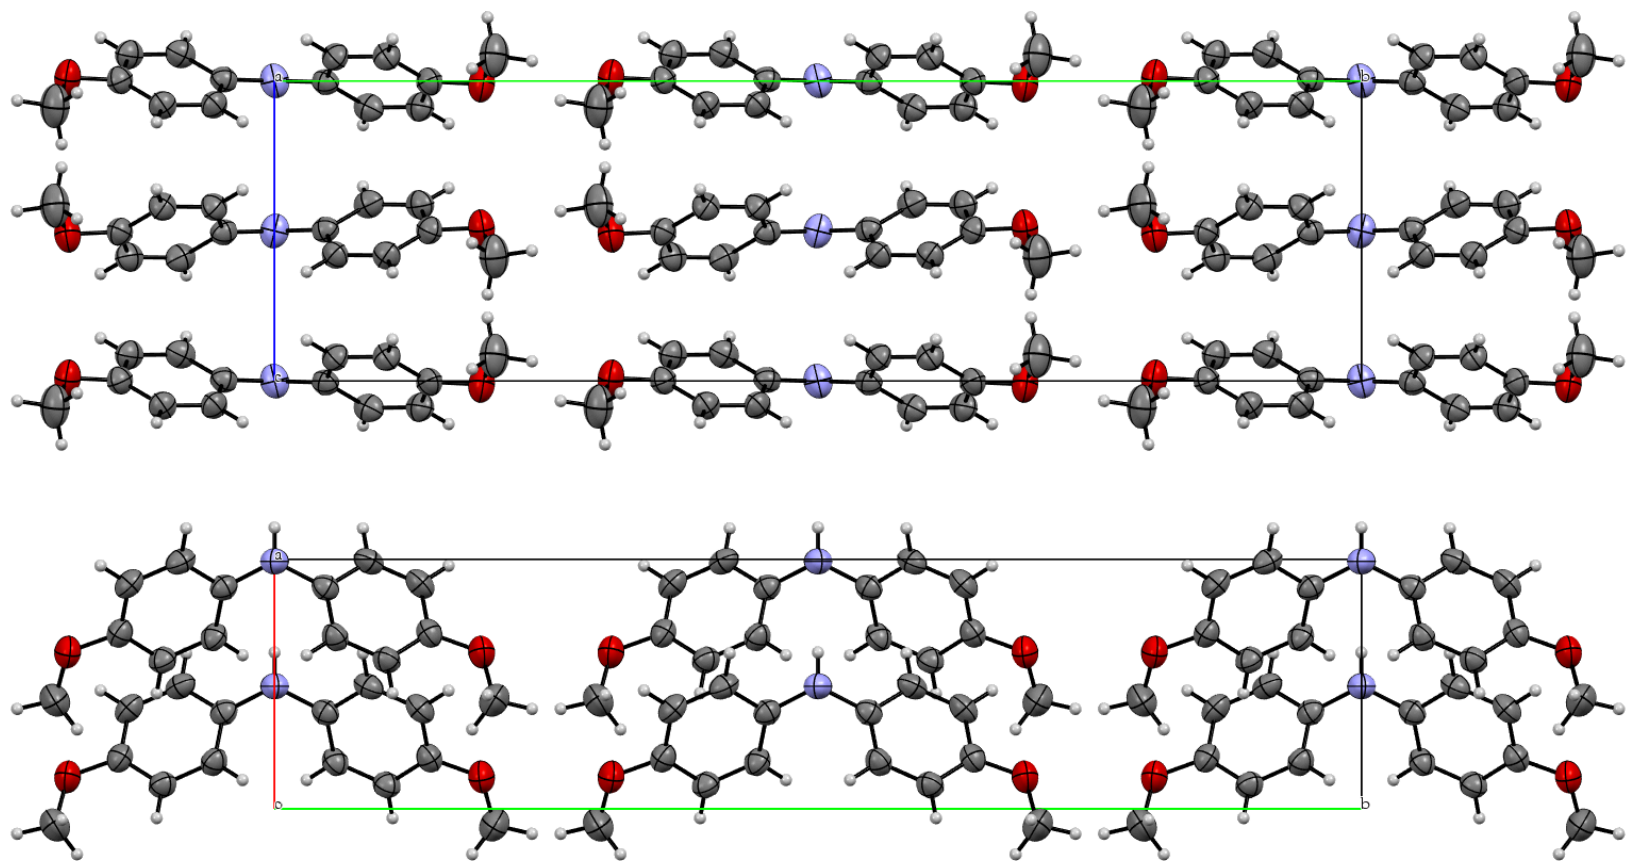

**Figure 2.** Packing of bis(4-methoxyphenyl)amine (**2a**) (CCDC 1417939) in crystalline lattice. Views along axes *a* (top) and *c* (bottom) are shown.
